1 **Microbial metabolism and adaptations in *Atribacteria*-dominated methane hydrate sediments**

2 Jennifer B. Glass<sup>1\*</sup>, Piyush Ranjan<sup>2#</sup>, Cecilia B. Kretz<sup>§</sup>, Brook L. Nunn<sup>3</sup>, Abigail M. Johnson<sup>1</sup>,  
3 Manlin Xu<sup>1</sup>, James McManus<sup>4</sup>, Frank J. Stewart<sup>2,5</sup>

4

5 <sup>1</sup>School of Earth and Atmospheric Sciences, Georgia Institute of Technology, Atlanta, GA, USA;

6 <sup>2</sup>School of Biological Sciences, Georgia Institute of Technology, Atlanta, GA, USA; <sup>3</sup>Department

7 of Genome Sciences, University of Washington, Seattle, WA; <sup>4</sup>Bigelow Laboratory for Ocean

8 Sciences, East Boothbay, ME, USA; <sup>5</sup>Department of Microbiology & Immunology, Montana State

9 University, Bozeman, MT, USA

10

11 \*Corresponding Author: [jennifer.glass@eas.gatech.edu](mailto:jennifer.glass@eas.gatech.edu)

12

13 <sup>#</sup>Now at: Michigan Medicine, University of Michigan, Ann Arbor, Michigan, USA;

14 <sup>§</sup>Now at: Association of Public Health Laboratories, Manager of Emerging and Zoonotic

15 Infectious Diseases, Silver Spring, MD, USA

16

17 **Running Title:** *Atribacteria* adaptations in methane hydrate ecosystem

18 **Dedication:** To Katrina Edwards

19

20 **Originality-Significance Statement:** This work provides insights into the metabolism and

21 adaptations of microbes that are ubiquitous and abundant in methane-rich ecosystems. Our findings

22 suggest that bacterial fermentation is a source of acetate for aceticlastic methanogenesis and a

23 driver of iron reduction in the metal reduction zone. *Atribacteria*, the most abundant phylum in gas

24 hydrate-bearing sediments, possess multiple strategies to cope with environmental stress.

25 **Summary:** Gas hydrates harbor gigatons of natural gas, yet their microbiomes remain  
26 understudied. We bioprospected 16S rRNA amplicons, metagenomes, and metaproteomes from  
27 methane hydrate-bearing sediments under Hydrate Ridge (offshore Oregon, USA, ODP Site 1244,  
28 2-69 mbsf) for novel microbial metabolic and biosynthetic potential. *Atribacteria* sequences  
29 generally increased in relative sequence abundance with increasing sediment depth. Most  
30 *Atribacteria* ASVs belonged to JS-1-Genus 1 and clustered with other sequences from gas hydrate-  
31 bearing sediments. We recovered 21 metagenome-assembled genomic bins spanning three  
32 geochemical zones in the sediment core: the sulfate-methane transition zone, metal  
33 (iron/manganese) reduction zone, and gas hydrate stability zone. We found evidence for bacterial  
34 fermentation as a source of acetate for aceticlastic methanogenesis and as a driver of iron reduction  
35 in the metal reduction zone. In multiple zones, we identified a Ni-Fe hydrogenase-Na<sup>+</sup>/H<sup>+</sup>  
36 antiporter supercomplex (Hun) in *Atribacteria* and *Firmicutes* bins and in other deep subsurface  
37 bacteria and cultured hyperthermophiles from the *Thermotogae* phylum. *Atribacteria* expressed  
38 tripartite ATP-independent (TRAP) transporters downstream from a novel regulator (AtiR).  
39 *Atribacteria* also possessed adaptations to survive extreme conditions (e.g., high salt brines, high  
40 pressure, and cold temperatures) including the ability to synthesize the osmolyte di-myo-inositol-  
41 phosphate as well as expression of K<sup>+</sup>-stimulated pyrophosphatase and capsule proteins.

42

## 43 **Introduction**

44 Gas clathrate hydrates are composed of solid water cages encasing gas molecules, commonly  
45 methane (CH<sub>4</sub>). Methane hydrates form naturally under high pressure and low temperature along  
46 continental margins (Kvenvolden, 1993; Mazurenko and Soloviev, 2003; Hester and Brewer, 2009;  
47 Collett et al., 2015). Continental margins and shelves harbor gigatons of natural gas in hydrates,  
48 which are susceptible to dissociation due to rising ocean temperatures, with potential for releasing  
49 massive methane reservoirs to the ocean and the atmosphere, which could exacerbate global  
50 warming (Archer et al., 2009; Ruppel and Kessler, 2017).

51           Despite the global importance of gas hydrates, their microbiomes remain largely unknown.  
52    Microbial cells are physically associated with hydrates (Lanoil et al., 2001), and the taxonomy of  
53    these hydrate-associated microbiomes is distinct from non-hydrate-bearing sites (Inagaki et al.,  
54    2006), possibly due to more extreme environmental conditions. Because salt ions are excluded  
55    during hydrate formation, porewaters of hydrate-bearing sediments are hypersaline (Ussler III and  
56    Paull, 2001; Bohrmann and Torres, 2006). Hydrate-associated microbes may possess adaptations  
57    to survive high salinity and low water activity, as well as low temperatures and high pressures  
58    (Honkalas et al., 2016). However, knowledge of the genetic basis of such adaptations is incomplete,  
59    as genomic data for hydrate communities are sparse and most hydrate microbiomes have been  
60    characterized primarily through single-gene taxonomic surveys.

61           Global 16S rRNA gene surveys show that the JS-1 sub-clade of the uncultivated bacterial  
62    candidate phylum *Atribacteria*, also known as *Caldiatribacteriota*, is the dominant taxon in gas  
63    hydrates (Reed et al., 2002; Inagaki et al., 2003; Kormas et al., 2003; Newberry et al., 2004;  
64    Webster et al., 2004; Inagaki et al., 2006; Webster et al., 2007; Fry et al., 2008; Kadnikov et al.,  
65    2012; Parkes et al., 2014; Yanagawa et al., 2014; Chernitsyna et al., 2016; Gründger et al., 2019)  
66    and in other marine and freshwater sediment ecosystems with abundant methane (Blazejak and  
67    Schipper, 2010; Gies et al., 2014; Carr et al., 2015; Hu et al., 2016; Nobu et al., 2016; Lee et al.,  
68    2018; Bird et al., 2019). The other major *Atribacteria* lineage, OP-9, primarily occurs in hot springs  
69    (Dodsworth et al., 2013; Rinke et al., 2013) and thermal bioreactors (Nobu et al., 2015). Marine  
70    *Atribacteria* are dispersed through ejection from submarine mud volcanoes (Hoshino et al., 2017;  
71    Ruff et al., 2019), and environmental heterogeneity may select for locally adapted genotypes.  
72    *Atribacteria* are highly enriched in anoxic, organic, and hydrocarbon rich sediments (Chakraborty  
73    et al., 2020; Hoshino et al., 2020) and have recently been discovered to be actively reproducing in  
74    the deep subsurface (Vuillemin et al., 2020). The phylogenetic diversity of *Atribacteria* genera  
75    suggests the potential for uncharacterized variation in functional niches.

76 *Atribacteria* appear to rely primarily on heterotrophic fermentative metabolisms. The high-  
77 temperature OP-9 lineage ferments sugars to hydrogen, acetate, and ethanol (Dodsworth et al.,  
78 2013; Katayama et al., 2020). The low-temperature JS-1 lineage ferments propionate to hydrogen,  
79 acetate, and ethanol (Nobu et al., 2016). Some JS-1 strains can also ferment short-chain n-alkanes  
80 (e.g. propane) into fatty acids by fumarate addition (Liu et al., 2019). Both JS-1 and OP-9 lineages  
81 possess genes encoding bacterial microcompartment shell proteins that may sequester toxic  
82 aldehydes and enable their condensation to carbohydrates (Nobu et al., 2016). Marine sediment JS-  
83 1 express genes to use allantoin as an energy source or chemical protectant and, unlike most deep  
84 subsurface bacteria, also encode a membrane-bound hydrogenase complex cotranscribed with an  
85 oxidoreductase, suggesting the ability for anaerobic respiration (Bird et al., 2019).

86 Here we examined the distribution, phylogeny, and metabolic potential of uncultivated JS-  
87 1 *Atribacteria* beneath Hydrate Ridge, off the coast of Oregon, USA, using a combination of 16S  
88 rRNA gene amplicon, metagenomic, and metaproteomic analysis. We found that *Atribacteria* from  
89 JS-1 Genus-1 are abundant throughout in the gas hydrate stability zone (GHSZ) and that they harbor  
90 numerous strategies for tolerance of osmotic stress, including many biosynthesis pathways for  
91 unusual osmolytes.

92

## 93 **Results and Discussion**

94 **Geochemical gradients.** Sediment core samples spanned three geochemical zones from 0-  
95 69 meters below seafloor (mbsf) at the ODP Site 1244 at Hydrate Ridge, off the coast of Oregon,  
96 USA (Fig. S1; Tréhu et al., 2003): the sulfate-methane transition zone (SMTZ; 2-9 mbsf; cores  
97 C1H2, C1H3, F2H4), the metal (iron/manganese) reduction zone (MRZ; 18-36 mbsf; cores F3H4,  
98 C3H4, E5H5), and the GHSZ (45-124 mbsf; cores E10H5, E19H5; Fig. 1A, Table S1). Sediment  
99 porewater methane concentrations (approximate, due to loss during sampling) increased from  
100 negligible at the seafloor to 8% by volume at 3-5 mbsf, and remained <5% below 5 mbsf, except  
101 for sample C3H4 (21 mbsf, MRZ) with ~18% methane (Fig. 1A). Sulfate dropped from 28 to <1

102 mM from 0-9 mbsf (the SMTZ) and remained <1 mM below 9 mbsf (Fig. 1A). In the MRZ,  
103 dissolved Mn and Fe peaked at 6 and 33  $\mu\text{M}$ , respectively, while outside of the MRZ, dissolved  
104 Mn was  $\sim 1 \mu\text{M}$  and dissolved Fe was 7-20  $\mu\text{M}$  (Fig. 1A). Dithionite-extractable (see Roy et al.  
105 (2013)), termed here “reactive”, Fe (0.4-1.4%) and Mn (0.002-0.012%) generally increased with  
106 depth (Table S1). Total organic carbon concentrations varied between 1-2 weight % (Table S1).  
107 Gas hydrate was observed from 45-125 mbsf in freshly recovered sediment cores, which contained  
108 up to 20% hydrate in the pore space, primarily as hydrate lenses or nodule patches (Tréhu et al.,  
109 2004; Fig. 1A). Estimated *in situ* salinity ranged from seawater salinity (35  $\text{g kg}^{-1}$ ) to  $>100 \text{ g kg}^{-1}$   
110 and was highest in the GHSZ (Milkov et al., 2004). *In situ* temperature ranged from  $\sim 4^\circ\text{C}$  at the  
111 seafloor to  $\sim 6-11^\circ\text{C}$  in the GHSZ (ShipboardScientificParty, 2003).

112 **Atribacteria dominate ASVs in gas hydrate stability zone.** *Actinobacteria*, *Atribacteria*,  
113 *Chloroflexi*, and *Planctomycetota* were the dominant bacterial phyla at Site 1244 (Fig. 1B).  
114 *Asgardarchaeota* and *Thermosplasmata* were the dominant archaeal phyla, with a notable rise in  
115 *Hadesarchaea* in the MRZ. Phylogenetic diversity in 16S rRNA gene amplicons based on the  
116 Shannon index and species richness based on the Chao1 index were highest in the SMTZ and MRZ,  
117 and lowest in the zones dominated by *Atribacteria*, in between the SMTZ and MRZ, and in the  
118 GHSZ (Fig. 1C). The relative sequence abundance of *Atribacteria* 16S rRNA amplicons ranged  
119 from 10-15% in the near surface to 80-85% at the top of the MRZ and the GHSZ (Fig. 1B). Most  
120 of the *Atribacteria* ASVs ( $n=20$ ) belonged to JS-1 Genus 1 and clustered with other seep- and  
121 hydrate-associated sequences (Fig. 2A). ASV\_368 comprised 54% of all amplicons in the GHSZ,  
122 and most GenBank sequences with 100% similarity to ASV\_368 were from hydrate-bearing  
123 sediments from the Pacific Ocean basin (Table S2).

124 Metagenome-assembled binning yielded 21 MAGs with  $>35\%$  completeness and  $<10\%$   
125 contamination including 17 bacteria and 4 archaea (Table S3). These MAGs included five  
126 *Dehalococcoidia* (*Chloroflexi*) in the SMTZ, MRZ, and GHSZ, and five *Firmicutes* (*Clostridia*) in

127 the SMTZ and MRZ (Table S3). Other MAGs included one *Calditrichaeota* in the SMTZ, one each  
128 of *Bacteroidetes*, *Spirochaeta*, *Hadesarchaea*, and *Methanosarcinales* (*Euryarchaeota*) in the  
129 MRZ, and one *Atribacteria* in the GHSZ (MAG E10H5-B2). The higher relative sequence  
130 abundance of *Atribacteria* 16S rRNA sequences at the top of the MRZ and the GHSZ is consistent  
131 with higher read recruitment (~4-8%) of *Atribacteria* MAG E10H5-B2 metagenomes from those  
132 zones vs. other depths (<1%). Although E10H5-B2 lacked a 16S rRNA gene, the 16S rRNA gene  
133 in RS-JS1 was 99.68% identical to 16S rRNA sequences from hydrate sediments from offshore  
134 Japan (Shimokita Peninsula) and Taiwan (Lin et al., 2014), and 99.43% identical to a clone from  
135 the South China Sea (Li and Wang, 2013; Fig. 2A, Table S2). Phylogeny based on eight  
136 concatenated ribosomal proteins confirmed that MAG E10H5-B2 belonged to JS-1 Genus 1, and  
137 formed a monophyletic group with MAGs from petroleum seeps in the Gulf of Mexico (E44-bin65;  
138 Dong et al., 2019; Chakraborty et al., 2020) and marine sediments in the Ross Sea (RS-JS1; Lee et  
139 al., 2018; Fig. 2B). Average amino acid identities between MAGs in JS-1 Genus 1 was 72-83%  
140 (Table S4).

141 **Anaerobic hydrocarbon degradation, acetoclastic methanogenesis, and fermentative**  
142 **iron reduction.** A recent study suggested that JS-1 can anaerobically degrade short-chain *n*-alkanes  
143 using fumarate addition enzymes (FAEs; Liu et al., 2019). Like oil reservoir *Atribacteria*, MAG  
144 E10H5-B2 contained genes encoding the glycyl radical protein subunit A (*faeA*, RXG63988, in the  
145 pyruvate formate lyase family) and D (*faeD*, RXG63989) on the same contig. However, the *faeA*  
146 gene product in MAG E10H5-B2 was shorter (786 aa) than in the oil reservoir MAGs (~860 aa)  
147 and the *fae* operon lacked the signature *faeC* gene between *faeD* and *faeA* that is characteristic of  
148 FAEs, suggesting that they may produce a different product.

149 Byproducts of fumarate addition enzymes (e.g., fatty acids) can be further degraded by  
150 other bacterial fermentation in marine sediments. *Firmicutes* degrade benzoate to acetate and  
151 transfer the electrons to crystalline Fe(III) minerals, producing dissolved Fe<sup>2+</sup>; thereafter, the  
152 acetate is converted to methane by syntrophic acetoclastic methanogenic archaea (Aromokeye et

153 al., 2020). The relative sequence abundance of *Firmicutes* and the presence of aceticlastic  
154 *Methanosarcinales* (MAG F3H4-B6; Table S3) indicate that fermentative iron reduction was likely  
155 the source of the Fe<sup>2+</sup> peak and the methane peak in the MRZ (Fig. 1A). Acetate for aceticlastic  
156 methanogenesis could also come from other acetogens including *Atribacteria* (Carr et al., 2015).

157 A biogenic source of methane to the gas hydrates at Hydrate Ridge is consistent with  
158 previous isotopic analyses (Kastner et al., 1998). Production of acetate by fermentative bacteria  
159 below the SMTZ challenges the previous paradigm that acetate was completely consumed in the  
160 SMTZ and therefore that biogenic methane in gas hydrates originated solely from  
161 hydrogenotrophic methanogenesis via CO<sub>2</sub> reduction (Whiticar et al., 1995). However, the carbon  
162 isotopic composition of methane in the gas hydrate at Hydrate Ridge is more consistent with a CO<sub>2</sub>  
163 reduction pathway, and there may be additional deeper sources of hydrogenotrophic methane that  
164 mask the contribution from aceticlastic methanogenesis.

165 **Predicted respiratory function of novel Hun supercomplex.** Two MAGs (*Atribacteria*  
166 E10H5-B2 and *Firmicutes* E5H5-B3) contained genes for a putative operon encoding a 16-subunit  
167 respiratory complex, hereafter designated Hun. The *hun* operon was also present in *Atribacteria*  
168 MAGs and SAGs from Baltic Sea sediments (Bird et al., 2019), in diverse deep biosphere bacterial  
169 MAGs (e.g. *Atribacteria*, *Omnitrophica*, *Elusimicrobia*, *Bacteriodetes* (Fig. 3A, Table S5)), and in  
170 hyperthermophilic bacterial isolates from the genus *Kosmotoga* (*Thermotogae* phylum; Fig. 3A).  
171 *Atribacteria hun* genes likely encode a complex of four protein modules that couple H<sup>+</sup> and Na<sup>+</sup>  
172 translocation to H<sub>2</sub> production (Fig. 3B) based on their similarity to characterized proteins (Schut  
173 et al., 2016).

174 Additional analysis provided more insights into Hun function and phylogeny. The large  
175 hydrogenase subunit HunG was classified as a [NiFe] Group 4g-hydrogenase according to the  
176 Hydrogenase Database (Søndergaard et al., 2016). Group 4g-hydrogenases are biochemically  
177 unclassified but predicted to be ferredoxin-coupled and may couple reduced ferredoxin oxidation  
178 to proton reduction and H<sup>+</sup>/Na<sup>+</sup> translocation (Greening et al., 2016). Based on the similarity of



179 HunAB to anaerobic sulfite reductase (Asr) subunits A and B, which transfer electrons from  
180 ferredoxin to the active site in AsrC (missing in the *hun* operon), HunABC likely accept electrons  
181 from ferredoxin and pass them through iron-sulfur clusters to  $2\text{H}^+$  for reduction to  $\text{H}_2$  at HunEFGP's  
182 Ni-Fe active site, as suggested by the presence of two conserved CxxC motifs (L1 and L2) for Ni-  
183 Fe cofactor binding in HunG (Fig. 4A). Further analysis revealed that conserved residues for the  
184 Ni-Fe active site were different for HunG than other hydrogenases: CGIC-CYCC vs. CGIC-CxxC  
185 in other Group 4 hydrogenases (Fig. 4A). HunG was evolutionarily distant from other Group 4g  
186 sequences (Fig. 4A, B). In some MAGs, a 4Fe-4S molybdopterin domain-containing protein was  
187 present in between HunB and HunC (Fig. 3A). P-module-like subunits HunDHILK are predicted  
188 to be proton-pumping transmembrane proteins and Na-module-like subunits HunIJKLMNO are  
189 homologs of the  $\text{Na}^+/\text{H}^+$  antiporter MnhABCDEFGH in Mrp-Mbh-type complexes. ATP is then  
190 generated via  $\text{Na}^+$ -specific ATP synthases (Bird et al., 2019). Electrons from  $\text{H}_2$  could be transferred  
191 back to ferredoxin by the activity of the heterodisulfide reductase (HdrA)-methyl viologen  
192 hydrogenase (MvhAGD) complex.

193 **Transporters expressed in metaproteome.** To assess gene expression, we analyzed  
194 metaproteomes from a subset of Site 1244 cores (C1H2, C3H4, and E10H5, from ~2, 20, and ~69  
195 mbsf, respectively). Although we recovered few peptides of high quality, several robust hits were  
196 identified, including several types of transporters and cell envelope-associated proteins (Table 1).  
197 The expressed proteins were identified using *Atribacteria* MAGs from IODP Site 1244 as the  
198 reference database (see Methods) and had closest matches to other *Atribacteria* genomes (Table 1),  
199 suggesting that they originated from *Atribacteria*. Expressed proteins included a high-affinity  
200 branched-chain amino acid transport system permease (LivH) and multiple tripartite ATP-  
201 independent (TRAP) transporters (Fig. 5A). TRAP transporters use an electrochemical gradient  
202 ( $\text{H}^+$  or  $\text{Na}^+$ ) and a substrate-binding protein to transport a wide variety of molecules across the  
203 membrane (Rosa et al., 2018). Conserved residues within the TRAP substrate-binding protein  
204 confer specificity, with a conserved arginine residue essential for carboxylate transport (Fischer et



205 al., 2015). In JS-1 MAGs from oil reservoirs, TRAP transport genes were associated with fumarate  
206 addition genes and likely transport fumarate or succinate for addition to hydrocarbons (Liu et al.,  
207 2019). In MAG E10H5-B2, genes for choline, inositol, and D-galacturonate catabolism often  
208 surrounded TRAP transporters (Fig. 5A), consistent with the finding that TRAP transporters can  
209 transport a much broader range of compounds than originally known (Vetting et al., 2015).

210 **AtiR, a novel regulator.** Several of the expressed transporter proteins were encoded by  
211 genes downstream from a novel gene predicted to encode an ~85-amino acid helix-turn-helix  
212 xenobiotic response element (XRE) transcriptional regulator, which we named “AtiR” (Table S6;  
213 Fig. 5). AtiR was present in other genomes from Site 1244, in an *Atribacteria* MAG from marine  
214 hydrothermal sediment from Guaymas Basin (Zhou et al., 2020), and in unbinned contigs from  
215 marine hydrate-bearing sediments from offshore Shimokita Peninsula (Kawai et al., 2014 mbsf,  
216 core S12H4; ). AtiR was also found in *Firmicutes* from other depths in Site 1244, including  
217 *Clostridia* MAG 1244-F3-H4-B2, *Firmicutes* MAG 1244-F2-H4-B10, and *Aminicenantes* MAG  
218 1244-C3H4-B23. AtiR was also found in *Omnitrophica* genomes from Mid-Cayman Rise vent  
219 fluid plumes and in JS-1 genomes from Aarhus Bay, Denmark. Genes downstream of *atiR* were  
220 dominated by transporters for organic solutes (*tct*, *dct*, *ugp*), branched chain amino acids (*liv*),  
221 hydrolases (choline sulfatase, sialidase, tryptophanase, cysteine desulfurase), peptidases,  
222 racemases, and RTX-toxin (Tables S6; Fig. 5A). XRE regulators are widely distributed across the  
223 tree of life and regulate diverse metabolic functions and oxidative stress responses, typically as  
224 repressors that bind to DNA (Fig. 5B) to prevent transcription in the absence of a ligand. Methane-  
225 hydrate bacteria may use AtiR to regulate cellular degradation of peptides and proteins to amino  
226 acids, either for nutrient acquisition or for survival under environmental stress (Bergkessel et al.,  
227 2016).

228 **Osmotic stress survival.** Any life that can persist in brine pockets within methane hydrate  
229 must contend with high salinity (up to ~3x that of seawater) and low water potential. We found a  
230 K<sup>+</sup> stimulated pyrophosphatase, which is involved in salt stress in other bacteria (López-Marqués

231 et al., 2004; Tsai et al., 2014), expressed the GHSZ sample (Table 1). *Atribacteria* MAG E10H5-  
232 B2 also contained numerous genes for the “salt out” survival strategy, in which osmotic pressure  
233 is maintained by exporting cations (Wood, 2015). Cation export systems included efflux systems,  
234 mechanosensitive ion channels, and Na<sup>+</sup>-H<sup>+</sup> antiporters (Table 2). *Atribacteria* MAG E10H5-B2  
235 also contained numerous MazEF toxin-antitoxin systems (Table S7), which are involved in  
236 translational control during stress response (Culviner and Laub, 2018).

237 A second salt survival strategy is import and/or biosynthesis of osmolytes, most often polar,  
238 water-soluble, and uncharged organic compounds and/or extracellular polymers. For example,  
239 glycine betaine is abundant in saline fluids from deep sediment basins (Daly et al., 2016).  
240 *Atribacteria* MAG E10H5-B2 contained genes for transport of trehalose and biosynthesis of the  
241 common osmolytes glutamine, glutamate, and poly-gamma-glutamate, all of which had homologs  
242 in other *Atribacteria* MAGs (Table 2). A capsular polysaccharide biosynthesis protein was among  
243 the handful of confident peptide hits (Table 1). *Atribacteria* transcripts for trehalose synthesis and  
244 transport were also present in other marine sediments (Bird et al., 2019). *Atribacteria* MAG E10H5-  
245 B2 also contained multiple copies of the aromatic amino acid exporter *yddG*, one of the most highly  
246 transcribed *Atribacteria* genes in other marine sediments (Bird et al., 2019). B2 and another  
247 *Atribacteria* MAG from a marine mud volcano (UBA9904) encoded myo-inositol-1 phosphate  
248 synthase (MIPS)/bifunctional IPC transferase and DIPP synthase (IPCT-DIPPS) for the unusual  
249 solute di-myo-inositol-phosphate (DIP; Table 2), which was previously only known to be made by  
250 hyperthermophiles (Santos and Da Costa, 2002).

251 The capacity for glycosylation may be another adaptation for survival of salt stress (Kho  
252 and Meredith, 2018). *Atribacteria* MAG E10H5-B2 and other *Atribacteria* encoded the non-  
253 mevalonate pathway for isoprenoid biosynthesis (*ispDEFGH*), exopolysaccharide synthesis  
254 proteins, numerous glycosyltransferases for transferring UDP- and GDP-linked sugars to a variety  
255 of substrates, and several proteins related to N-linked glycosylation (Table S8). Carbohydrate  
256 active enzymes are secreted by *Atribacteria* (Orsi et al., 2018) and may be involved in stress

257 response. *Atribacteria* MAG E10H5-B2 also encoded genes for propionate catabolism and a  
258 bacterial microcompartment superlocus with 94-99% amino acid identity to a *Atribacteria* SAG  
259 from the Marianas Trench (Fig. S2), which is thought to be involved in sugar and aldehyde  
260 metabolism in *Atribacteria* (Axen et al., 2014; Nobu et al., 2016).

261 **Adaptations to life in methane hydrates.** Microbes in the GHSZ in deep subsurface  
262 sediments appear to contain unique adaptations for survival in an extreme system with high salinity,  
263 high pressure, and low temperatures. Other probable environmental stress adaptations may include  
264 glycosylation and membrane modifications. It is also possible that these microbes can produce  
265 secondary metabolites that modify gas hydrate properties; we recently showed experimentally that  
266 recombinant *Chloroflexi* proteins from metagenomic sequences native to methane hydrate-bearing  
267 sediments alter the structure of clathrates (Johnson et al., 2020). More experiments are required to  
268 resolve the complex metabolic pathways and biosynthetic potential of life in methane hydrates,  
269 with important implications for stability of gas hydrates on our own planet (e.g. Snyder et al., 2020)  
270 and potential habitability and survival strategies of other planetary bodies in our solar system  
271 (Mousis et al., 2015; Kamata et al., 2019).

272  
273 **Acknowledgments.** We thank Vinayak Agarwal, Brett Baker, Jennifer Biddle, Jordan Bird,  
274 Anirban Chakraborty, Frederick Colwell, Sheng Dai, Xiyang Dong, Konstantinos Konstantinidis,  
275 Peter Girguis, Julie Huber, Casey Hubert, Raquel Lieberman, Karen Lloyd, Katie Marshall,  
276 Alejandra Prieto Davo, Brandi Reese, Claudia Remes, Emil Ruff, Anne Trehu, Despina Tsementzi,  
277 Paula Welander, Loren Williams, Jieying Wu, and Jenny Yang for helpful discussions; Phil  
278 Rumford and curatorial staff at the ODP Gulf Coast Repository for providing samples; and Shweta  
279 Biliya, Annie Hartwell, Janet Hatt, Mike Lee, Nastassia Patin, Ben Tully, and the Bioinformatics  
280 Virtual Coordination Network for technical assistance with sequencing and bioinformatic analysis.  
281 This research was funded by Center for Dark Energy Biosphere Investigations (C-DEBI) Small  
282 Research Grant to J.B.G. and C.B.K. (NSF OCE-0939564), NASA Exobiology grant to J.B.G. and

283 F.J.S. (NNX14AJ87G), NSF Biology Oceanography grant to F.J.S and J.B.G. (NSF OCE-  
284 1558916), NASA Exobiology grant to J.B.G. (80NSSC19K0477), and a Georgia Tech Earth and  
285 Atmospheric Sciences Frontiers Postdoctoral Fellowship to C.B.K. Metaproteomic analysis by  
286 B.L.N. was partially supported by the University of Washington's Proteomic Resource  
287 (UWPR95794). This is C-DEBI contribution [provided upon paper acceptance].  
288

## 289 **Experimental Procedures**

290 **Sample collection.** Sediments were cored at ODP site 1244 (44°35.1784'N; 125°7.1902'W; 895  
291 m water depth; **Fig. S1**) on the eastern flank of Hydrate Ridge ~3 km northeast of the southern  
292 summit on ODP Leg 204 in 2002 (Tréhu et al., 2003) and stored at -80°C at the ODP Gulf Coast  
293 Repository.

294  
295 **Geochemistry.** Data for dissolved methane, sulfate, manganese, iron, and iodide in sediment  
296 porewaters were obtained from Tréhu et al. (2003). Reactive iron and manganese were extracted  
297 from frozen sediments using the citrate-dithionite method (Roy et al., 2013) and measured by  
298 inductively coupled plasma optical emission spectrometer (Agilent Technologies 700 Series). Total  
299 carbon, total nitrogen and total sulfur were determined by CNS analyzer (Perkin Elmer 2400). Total  
300 inorganic carbon was measured by CO<sub>2</sub> coulometer (CM5130) with a CM5130 acidification  
301 module. Geochemical metadata are given in Table S1 and archived in BCO-DMO project 626690.  
302

303 **DNA extraction.** DNA was extracted, in duplicate, from 8-20 g of sediment from the following  
304 depths in meters below seafloor (mbsf, using IODP core designations, see  
305 (ShipboardScientificParty, 2003)): 1.95-2.25 (C1-H2); 3.45-3.75 (C1-H3); 8.60 (F2-H4); 18.10  
306 (F3-H4); 20.69 (C3-H4); 35.65 (E5-H5); 68.55 (E10-H5); 138.89 (core E19-H5) using a MO-BIO  
307 PowerSoil total RNA Isolation Kit with the DNA Elution Accessory Kit, following the  
308 manufacturer protocol without beads. DNA pellets from two replicates from each depth were  
309 pooled together. DNA concentrations were measured using a Qubit 2.0 fluorometer with dsDNA  
310 High Sensitivity reagents (Invitrogen, Grand Island, NY, USA). DNA yields ranged from 4-15 ng  
311 per gram of sediments. Core E19-H5 (139 mbsf) yielded only 2 ng DNA per gram of sediment and  
312 yielded unreliable data due to contamination with sequences from the enzymes used in the library  
313 preparations. Therefore, this core segment was excluded from further analysis.  
314

315 **16S rRNA gene amplicon sequencing.** Microbial community composition was assessed by  
316 Illumina sequencing of the V3-V4 region of the 16S rRNA gene. The V3-V4 region was PCR-  
317 amplified using primers F515 and R806 (Caporaso et al., 2011), each appended with barcodes and  
318 Illumina-specific adapters according to (Kozich et al., 2013). Reactions consisted of 1-2 µL DNA  
319 template (2 ng), 5 µL of 10x Taq Mutant reaction buffer, 0.4 µL of KlenTaq LA Taq Polymerase  
320 (DNA Polymerase Technology, St. Louis, MO, USA), 2 µL of 10 mM dNTP mix (Sigma Aldrich,  
321 St. Louis, MO, USA), 2 µL of reverse and forward primers (total concentration 0.4 µM), and DNA-  
322 free water (Ambion, Grand Island, NY, USA) for the remainder of the 50 µL total volume. PCR  
323 conditions were an initial 5-min denaturation at 94°C, followed by 35 cycles of denaturation at  
324 94°C (40 sec), primer annealing at 55°C (40 sec), and primer extension at 68°C (30 sec). Amplicon  
325 libraries were purified using a QIAquick PCR Purification Kit (Qiagen, Germantown, MD, USA),  
326 quantified by Qubit (Life Technologies), and pooled in equimolar concentration. Amplicons were  
327 sequenced on an Illumina MiSeq across two runs using the V2 500-cycle kit with 5% PhiX to  
328 increase read diversity. 16S rRNA sequences were deposited into NCBI SAMN04214977-  
329 04214990 (PRJNA295201).  
330

331 **16S rRNA gene amplicon taxonomic analysis.** 16S rRNA sequences were trimmed using Trim  
332 Galore (criteria: length >100 bp length, Phred score >25). Sequences were dereplicated with a  
333 cutoff of 200 bp, chimeras were removed, and ASVs were resolved using deblur (Amir et al., 2017).  
334 Shannon and chao 1 diversity indices were calculated in R using phyloseq (McMurdie and Holmes,  
335 2013).  
336

337 **Atribacteria ASV phylogenetic analysis.** The reference alignment included *Atribacteria* 16S  
338 rRNA gene sequences from environmental clones from Inagaki et al. (2006); Nobu et al. (2016),

339 Carr et al. (2015), and Yarza et al. (2014). The alignment was trimmed to include only the V3-V4  
340 region spanned by the *Atribacteria* ASV sequences, resulting in a final alignment with 198 bases.  
341 The DNA sequences were aligned in MAFFT with the L-INS-i option (Katoh and Standley, 2013).  
342 A neighbor-joining phylogeny with 100 bootstraps was rooted with members of the *Synergistetes*  
343 bacterial phylum.

344  
345 **Multiple displacement amplification, library preparation, and sequencing.** Genomic DNA was  
346 amplified from all samples using a REPLI-g Single Cell Kit (Qiagen, Germantown, MD, USA)  
347 using UV-treated sterile plasticware and reverse transcription-PCR grade water (Ambion, Grand  
348 Island, NY, USA). Quantitative PCR showed that the negative control began amplifying after 5 hr  
349 of incubation at 30°C, and therefore, the 30°C incubation step was shortened to 5 hr using a Bio-  
350 Rad C1000 Touch thermal cycler (Bio-Rad, Hercules, CA, USA). DNA concentrations were  
351 measured by Qubit. Two micrograms of MDA-amplified DNA were used to generate genome  
352 libraries using a TruSeq DNA PCR-Free Kit following the manufacturer’s protocol (Illumina, San  
353 Diego, CA, USA). The resulting libraries were sequenced using a Rapid-Run on an Illumina HiSeq  
354 2500 to obtain 100 bp paired-end reads. Sequencing statistics are provided in Table S3.

355  
356 **Metagenome assembly, binning, and annotation.** Demultiplexed Illumina reads were mapped to  
357 known adapters using Bowtie2 in local mode to remove any reads with adapter contamination.  
358 Demultiplexed Illumina read pairs were quality trimmed with Trim Galore (Babraham  
359 Bioinformatics) using a base Phred33 score threshold of Q25 and a minimum length cutoff of 80  
360 bp. Paired-end reads were then assembled into contigs using SPAdes assembler with --meta option  
361 for assembling metagenomes, iterating over a range of k-mer values  
362 (21,27,33,37,43,47,51,55,61,65,71,75,81,85,91,95). Assemblies were assessed with reports  
363 generated with QUAST. Features on contigs were predicted through the Prokka pipeline with  
364 Barrnap for rRNA, Aragorn for tRNA, Infernal and Rfam for other non-coding RNA, and Prodigal  
365 for protein coding genes. Metagenomic 16S rRNA sequences predicted by Barrnap were analyzed  
366 by BLASTN analysis against the SILVA SSU database version 138.

367 Annotation of protein-coding genes was performed as follows: 1) BLASTP search against  
368 the default set of core genomes, followed by HMM search against a set of default core HMM  
369 profiles available in Prokka, 2) use of the BLAST Descriptor Annotator algorithm in BLAST2GO,  
370 which conducts BLAST against the NCBI nr database, 3) KEGG orthology assignment using  
371 GhostKoala and 4) InterProScan analysis, which involves cross-reference HMM searches across  
372 multiple databases to find Pfam families with close homology. Metagenomic sequences were  
373 deposited into NCBI SAMN07256342-07256348 (PRJNA390944). Whole Genome Shotgun  
374 projects has been deposited at DDBJ/ENA/GenBank under the accession JABUBK000000000-  
375 JABUBQ000000000.

376  
377 **Metagenome-assembled genomes.** Metagenome contigs were partitioned through MetaBAT  
378 (Kang et al., 2015) into metagenome-assembled genomes (MAGs) using tetranucleotide frequency  
379 and sequencing depth. Sequencing depth was estimated by mapping reads on to assembled contigs  
380 using Bowtie2 and Samtools. Completeness, contamination and strain level heterogeneity were  
381 assessed using single copy marker genes in CheckM (Parks et al., 2015). Gene features and their  
382 functional annotations for genome bins were extracted from the metagenome for the contigs that  
383 belong to the bins. Taxonomic affiliation for each bin was inferred via the least common ancestor  
384 (LCA) algorithm in MEGAN6 and by the top BLAST matches to the marker gene *rpoB*. Twenty-  
385 one MAGs with estimated completeness >50% were deposited into GenBank (Table S3). The B2  
386 MAG was deposited into GenBank as “Candidatus *Atribacteria* bacterium 1244-E10-H5-B2”  
387 (SAMN07342547; NMQN000000000.1). Read recruitments of metagenomic sequences to MAGs  
388 were performed using Bowtie2 (Langmead and Salzberg, 2012) normalized to the approximate  
389 number of genomes in the metagenome estimated with MicrobeCensus (Nayfach and Pollard,



390 2015). The average amino acid identity matrix was generated using the ANI-AAI matrix tool  
391 (Rodriguez-R and Konstantinidis, 2016).

392

393 ***Atribacteria* MAG and SAG phylogeny.** Public *Atribacteria* single cell amplified genomes  
394 (SAGs) or MAGs (77 genomes, as of July 2020) were collected into a Genome Group workspace  
395 in Pathosystems Resource Integration Center (PATRIC; Wattam et al., 2014). Six ribosomal  
396 proteins from the large rRNA subunit (L2, L3, L4, L6, L16, L18) and two from the large rRNA  
397 subunit (S3 and S19) were collected from the *Atribacteria* genomes using the Features tab in  
398 Genome Group View. The eight ribosomal proteins were concatenated and the amino acid  
399 sequences were aligned in MAFFT with the L-INS-i option (Katoh and Standley, 2013). A  
400 neighbor-joining phylogeny with 1000 bootstraps was rooted with members of the *Synergistetes*  
401 bacterial phylum.

402

403 **Maximum likelihood phylogenies.** Large subunit hydrogenase (HunG) and the xenobiotic  
404 response element regulator (AtiR) were made using sequences aligned in MAFFT with the L-INS-  
405 i option (Katoh and Standley, 2013). Neighbor-joining phylogenies were made with 100 bootstraps.

406

407 **Gene neighborhood diagrams.** Gene neighborhood diagrams for the *hun* gene neighborhood were  
408 made using the gene neighborhood tool (GNT) in EFI web tools using a “single sequence BLAST”  
409 function in “Retrieve Neighborhood Diagrams” set to an E-value of  $10^{-5}$  and a window size of 20  
410 (Zallot et al., 2019). The input sequence was NCBI accession RXG63129 for HunG.

411

412 **Metaproteomic sample preparation, mass spectrometry, and data analyses.** Proteins from  
413 E10-H5 were extracted from a 10 g of frozen sediment using a protocol adapted from Nicora et al.  
414 (2013). Briefly, 2.5 mL of desorption buffer (0.5 M NaCl, 0.1 M glycerol, 0.2% SDS, 6 M urea, 1  
415 mM EDTA, 100 mM ammonium bicarbonate) and 2 mL of a pH-buffered amino acid solution  
416 (containing equimolar histidine, lysine, and arginine, all 83 g l L<sup>-1</sup> in ultra-pure water, pH 7.0)  
417 was added to the sample on ice. The goal of the pH-buffered amino acid solution is to fill the  
418 electronegative mineral sites in the sample with positively charged amino acids to reduce  
419 absorption of proteins to the particles. Samples were vortexed 4x, alternating 5 minutes vortexing  
420 and 5 min ice. The sediment slurry was then sonicated with Bronson probe sonicator (4 x 30 s) to  
421 lyse cells and heated at 95°C for 5 min. The sediment was pelleted by centrifugation (10,000 x g,  
422 30 min, 4°C), and the supernatant was collected and stored on ice. The sediment pellet was washed  
423 2 more times with 3 mL desorption buffer and supernatants were combined. In order to remove the  
424 SDS prior to protein digestion and mass spectrometry analysis, the filter aided sample preparation  
425 (FASP) method was used (Ostasiewicz et al., 2010). Millipore Amicon 10 kDa filter units were  
426 used and cleaned following manufacturer’s directions. Samples were loaded on top of filters (~9  
427 mL) and centrifuged (3000 rpm, 90 min, 4°C). To remove all SDS, proteins retained on the filter  
428 were rinsed 3 times by adding 5 mL of 8 M urea in 50 mM ammonium bicarbonate and repeating  
429 the prior centrifugation step. Iodoacetamide (3 mL, 15 mM) was added to samples, incubated in  
430 the dark at room temperature for 30 minutes, and then centrifuged (3000 rpm, 90 min, 4°C).  
431 Proteins were then rinsed two times with 10 mL of 100 mM ammonium bicarbonate and centrifuged  
432 to remove liquid (3000 rpm, 90 min, 4°C). To digest protein on the filter, 0.5 µg of trypsin  
433 (modified, sequencing grade, Promega) was added to the filter, topped with 2.5 mL of 25 mM  
434 ammonium bicarbonate, vortexed, and incubated 12 hr at room temperature. Filtrate was collected  
435 by centrifugation (3000 rpm, 90 min, 4°C), and SpeedVaced to near dryness at 40°C. Peptides were  
436 then resuspended in 50 µL of 2% acetonitrile and 0.1% formic acid and desalted using Nest Group  
437 C18 Proto centrifugal macro columns following manufacturer’s instructions. Each 10 µL sample  
438 was separated on a NanoAquity UPLC with a 60 min gradient (2-35% acetonitrile) and analyzed  
439 on a Thermo Scientific Orbitrap Fusion Tribrid Mass Spectrometer operated in top20 data  
440 dependent acquisition mode.



441 A protein database for identifying the collected fragmentation spectra was generated from  
442 *Atribacteria* MAGs (C1H2\_C3H4ab\_E10H5\_contam.fasta). These databases were concatenated  
443 with 50 common contaminants, yielding a protein database of 10,325 proteins. To assign spectra to  
444 peptide sequences, correlative database searches were completed using Comet v. 2015.01 rev. 2  
445 (Eng et al., 2013; Eng et al., 2015). Comet parameters included: trypsin enzyme specificity, semi-  
446 digested, allowance of 1 missed cleavage, 10 ppm mass tolerance, cysteine modification of 57 Da  
447 (resulting from the iodoacetamide) and modifications on methionine of 15.999 Da (oxidation).  
448 Minimum protein and peptide thresholds were set at  $P > 0.95$  on Protein and Peptide Prophet  
449 (Nesvizhskii et al., 2003). Protein inferences from the whole-cell lysates were accepted by  
450 ProteinProphet if the thresholds noted above were passed, two or more peptides were identified,  
451 and at least one terminus was tryptic (Keller et al., 2002; Nesvizhskii et al., 2003; Pedrioli, 2010).  
452 For each peptide discussed in the manuscript, manual inspection of the spectral identification was  
453 completed. The mass spectrometry proteomics data have been deposited to the ProteomeXchange  
454 Consortium via the PRIDE partner repository (Vizcaino et al., 2015) with the dataset  
455 identifier PXD012479 (<https://www.ebi.ac.uk/pride/archive/> Login: reviewer08969@ebi.ac.uk  
456 Password: BP2V3yGA).

457 **Table 1.** Peptide hits for ODP Site 1244 sample E10-H5 (~69 mbsf). Matches are shown  
 458 for >70% identity to non-Hydrate Ridge genomes.  
 459

| Peptide                                             | NCBI accession number | Conserved domains                                                                        | Top hit, NCBI accession (% identity)                                                                  |
|-----------------------------------------------------|-----------------------|------------------------------------------------------------------------------------------|-------------------------------------------------------------------------------------------------------|
| EYKPKEDWKMNFSSSY<br>NLNTK                           | RXG64736              | LPS-assembly protein<br>LptD                                                             | OQY39007 (82%),<br><i>Atribacteria</i> 4572_76,<br>Guaymas Basin, Gulf<br>of California               |
| YSLKQMVLPILIGLIPIII<br>GFTLGWVPLAAFLIGVK<br>IVGALLA | MBA7568979            | K <sup>+</sup> -stimulated<br>pyrophosphate-<br>energized proton pump<br>HppA            | HDP36765 (91%),<br><i>Atribacteria</i> SpSt-1160,<br>contaminated<br>groundwater, New<br>York, USA    |
| PRMLSYILLALSLSLILL<br>KFFK                          | MQY74719              | Tripartite tricarboxylate<br>transporter TctB                                            | N/A                                                                                                   |
| PVSAAINLIHLLPIPLLIQ<br>RDLKEK                       | RXG64647              | Tripartite ATP-<br>independent<br>periplasmic transporter<br>DctQ                        | N/A                                                                                                   |
| NKINLIFSILIIIFLIVLTYE<br>GIILVKVGLNA                | RXG62936              | Tripartite ATP-<br>independent<br>periplasmic transporter<br>DctQ                        | N/A                                                                                                   |
| CSNLIKALLVVLVLSLG<br>ITLGIKAP                       | RXG64193              | Basic membrane<br>lipoprotein BmpA                                                       | PKP58720 (94%),<br><i>Atribacteria</i> HGW-1,<br>groundwater, Horonobe<br>URL, Japan                  |
| KPFRKSPGLIILLSTVAV<br>GFIIR                         | MBA7587931            | High-affinity branched-<br>chain amino acid<br>transport system<br>permease protein LivH | TET08159 (99%),<br><i>Atribacteria</i><br>E44_bin65, Gulf of<br>Mexico petroleum<br>seepage sediments |
| GIILIFLIAVITAVLVSYP<br>VLSPTP                       | RXG64813              | Capsular<br>polysaccharide<br>biosynthesis protein                                       | HBV56740 (76%),<br><i>Atribacteria</i> UBA9904,<br>petroleum reservoir,<br>North Slope Alaska         |

460

461 **Table 2. Putative osmotic stress-related genes in *Atribacteria* MAG E10-H5 B2.**  
 462 \*indicates multiple copies.

| Annotation                                 | Gene             | Accession             | Top hit (% identity)              | <i>Atribacteria</i> MAG with top hit | Top hit environment and reference for metagenomes                  |
|--------------------------------------------|------------------|-----------------------|-----------------------------------|--------------------------------------|--------------------------------------------------------------------|
| Na <sup>+</sup> efflux                     | <i>natB</i>      | RXG65900              | TET06401 (98%)                    | E44_bin65                            | Gulf of Mexico petroleum seep sediments (Chakraborty et al., 2020) |
| Na <sup>+</sup> channel                    | DUF554           | RXG63559              | TET10447 (99%)                    |                                      |                                                                    |
| K <sup>+</sup> transport                   | <i>trkAH</i> *   | RXG63511<br>RXG63512  | TET06940 (97%)<br>TET06939 (99%)  |                                      |                                                                    |
| Mechanosensitive ion channel               | <i>mscS</i>      | RXG63036              | TET10003 (97%)                    |                                      |                                                                    |
| Glutamine synthetase                       | <i>glnA</i>      | RXG65164              | TET08352 (99%)                    |                                      |                                                                    |
| Trehalose transporter                      | <i>sugAB</i>     | RXG66833-<br>RXG66834 | KUK55397- (94%)<br>KUK55398 (99%) | 34_128                               | Oil reservoir, North Slope, Alaska (Hu et al., 2016)               |
| Threonine/lysine efflux                    | <i>rhtB</i>      | RXG66248              | KUK55393 (91%)                    |                                      |                                                                    |
| Na <sup>+</sup> /H <sup>+</sup> antiporter | <i>mrpEFGB</i>   | RXG65834-<br>RXG65838 | TFB09297-<br>TFB09301 (91-95%)    | MT.SAG.1                             | Marianas Trench (Peoples et al., 2019)                             |
| Aromatic amino acid exporter               | <i>yddG</i> *    | RXG63201              | TFB08968 (91%)                    |                                      |                                                                    |
| Glutamate synthase                         | <i>gltD</i>      | RXG66270              | PKP56573 (94%)                    | HW-1                                 | Horonobe Underground Laboratory, Japan (Hernsdorf et al., 2017)    |
| Proline racemase                           | <i>prdF</i>      | RXG63210              | PKP58887 (92%)                    |                                      |                                                                    |
| Poly-gamma glutamate synthase              | <i>pgsCBW</i>    | RXG66317-<br>RXG66319 | PKP60458-<br>PKP60460 (~90%)      |                                      |                                                                    |
| DIPP synthesis pathway                     | MIPS/IPCT-DIPPS* | RXG66889-<br>RXG66888 | HBV57541-<br>HBV57542 (~80%)      | UBA9904                              | Haakon Mosby mud volcano, Barents Sea (Niemann et al., 2006)       |

463

464

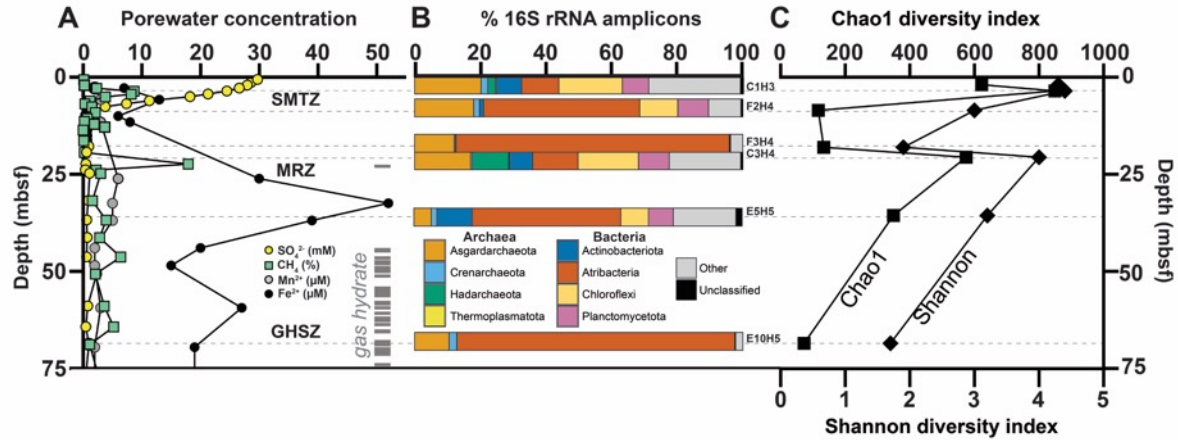

465

466 **Figure 1:** Porewater geochemistry and microbial taxonomy and diversity from sediment depth  
467 profiles at ODP 204 Site 1244, Hydrate Ridge, offshore Oregon, USA. **A:** Sulfate (yellow circles),  
468 methane (green squares), manganese (gray circles), and iron (black circles) concentrations, and  
469 depth of gas hydrate occurrences (gray dashes) from Tréhu et al. (2003). Sulfate and methane data  
470 are from core 1244B. Iron and manganese data are from core 1244E. Gas hydrate occurrence data  
471 are from core 1244C and 1244E. SMTZ: sulfate-methane transition zone; MRZ: metal reduction  
472 zone; GHSZ: gas hydrate stability zone. **B:** 16S rRNA gene amplicon taxonomic composition at  
473 the phylum level. “Other” category represents bacterial and archaeal phyla with <10% of total  
474 sequences. “Unclassified” represents sequences that were not classified at the phylum level. 16S  
475 rRNA amplicon data not shown for core C1H2 (see text). **C:** Microbial diversity based on Chao1  
476 (top axis, squares) and Shannon index (bottom axis, diamonds) for the same 16S rRNA gene  
477 amplicon samples as shown in panel B.  
478

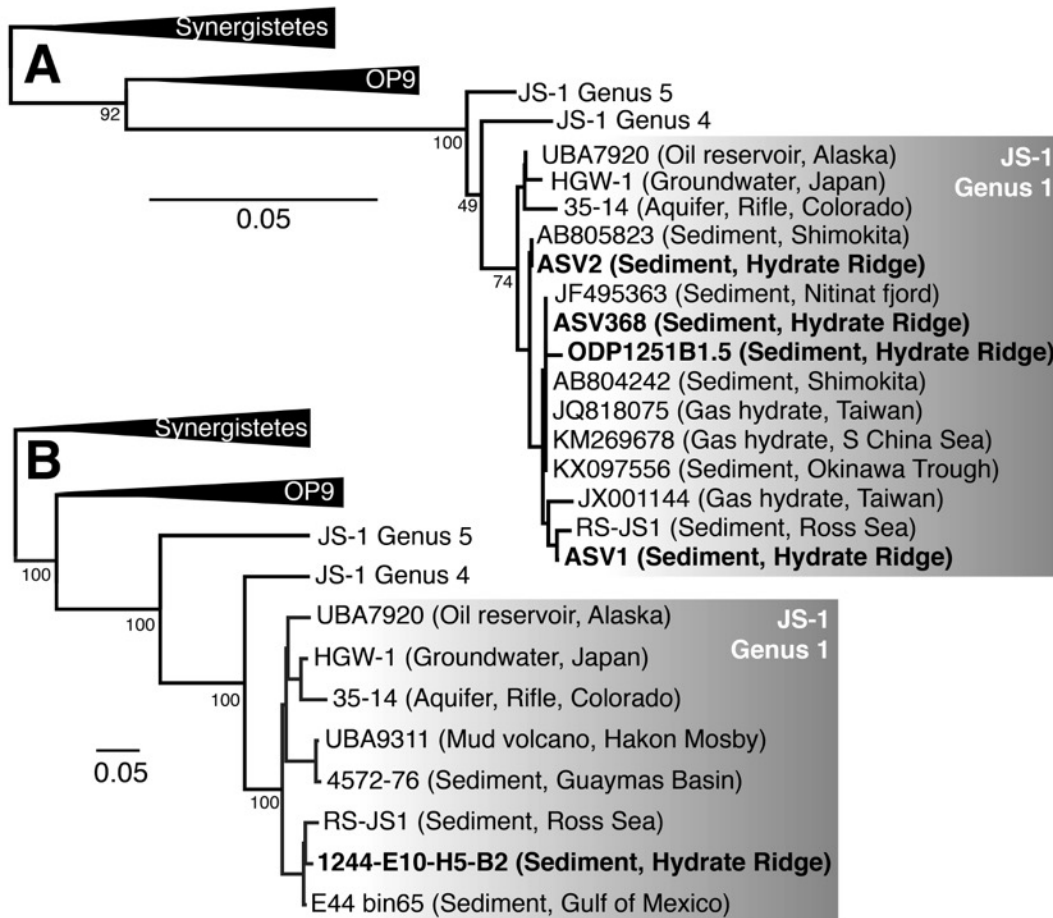

479  
480  
481  
482  
483  
484  
485  
486  
487  
488

**Figure 2: Neighbor-joining *Atribacteria* JS-1 Genus 1 phylogenies based on (A) 16S rRNA amplicons and (B) ribosomal proteins.** Bolded sequences are from Hydrate Ridge. 16S rRNA phylogeny including the top three most abundant *Atribacteria* ASVs from Site 1244 (see Table S2 for relative sequence abundances). ODP1251B1.5 is the dominant JS-1 16S rRNA clone from Hydrate Ridge Leg 204 cores as reported by Inagaki et al. (2006). Italicized names are from MAGs or SAGs; the rest of the sequences are from 16S amplicons. Genera labels are based on sequences from Yarza et al. (2014) and Liu et al. (2019). Conserved sites used in phylogenies: (A) 190 bases; (B) 846 amino acids.

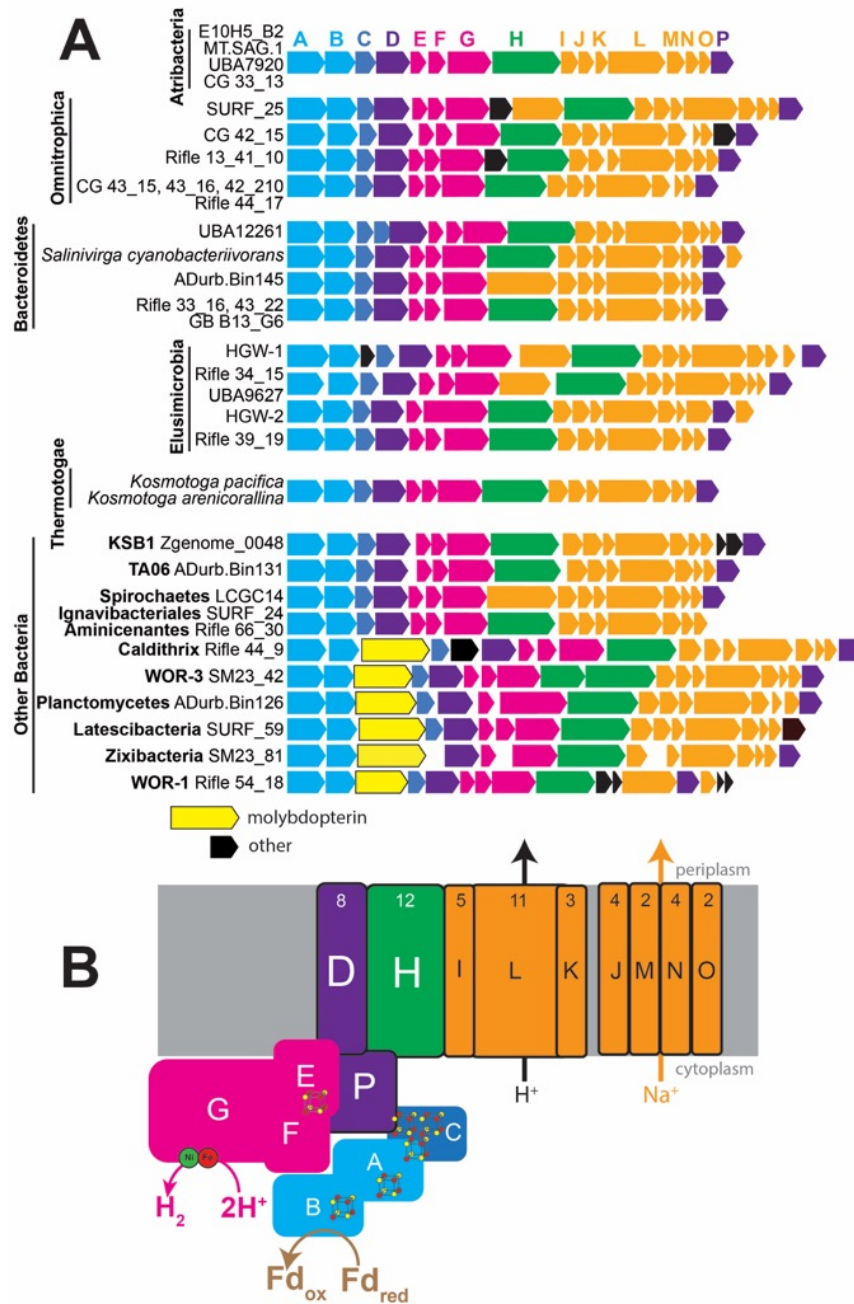

489  
 490  
 491  
 492  
 493  
 494  
 495  
 496  
 497  
 498  
 499  
 500  
 501

**Figure 3: Gene neighborhood and predicted function of the predicted multi-subunit Hun respiratory complex. A:** conserved gene cluster arrangement, with each color representing a different predicted protein. Some gene arrangements are found in more than one genome, as indicated. All MAGs and SAGs are from sediment samples. Sample abbreviations: ADurb: wastewater; CG: Crystal Geyser, Utah, USA; GB: Guaymas Basin, Gulf of California; HGW: Horonobe Underground Laboratory, Japan; LCGC: Loki's Castle, Mid-Atlantic Ridge, Atlantic Ocean; MT: Mariana Trench; SM: White Oak Estuary, North Carolina, USA; SURF: Stanford Underground Research Facility, South Dakota, USA; Rifle: Rifle research site, Colorado, USA; UBA12261: wetland surface sediment; UBA9627: Rifle research site, Colorado, USA. **B:** predicted cellular locations and functions based on homologs of the genes of the same colors encoded by the putative *hun* operon in panel A. Iron-sulfur clusters and the Ni-Fe active site of HunG are also shown.



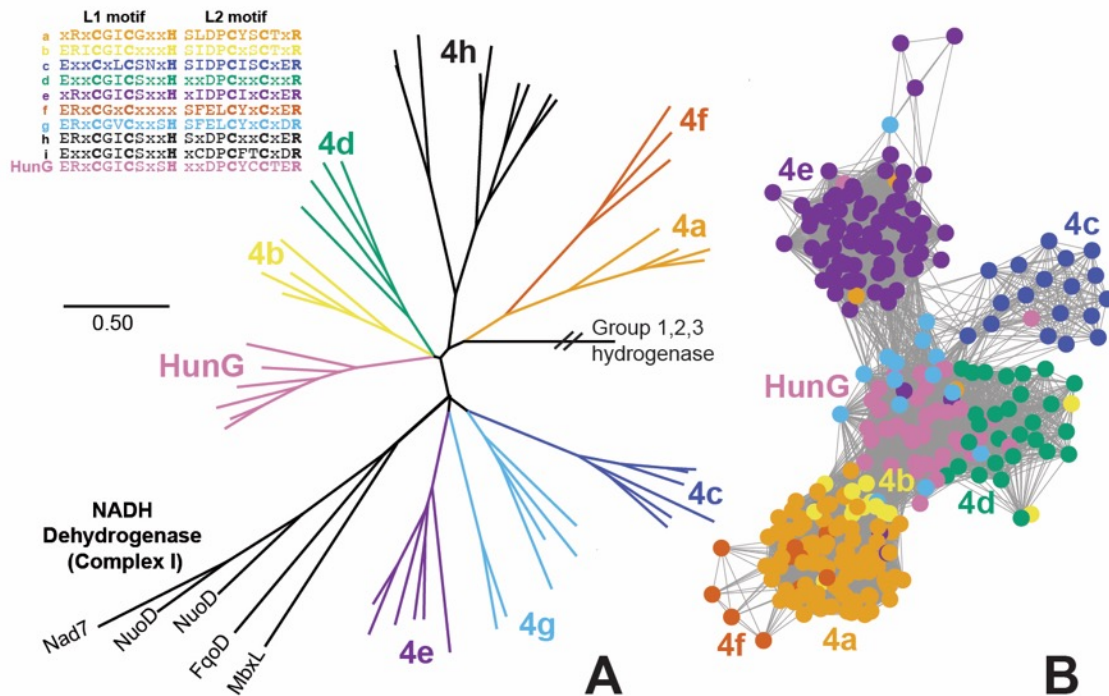

502  
503  
504  
505  
506  
507  
508  
509  
510  
511  
512

**Figure 4: Phylogeny and sequence clustering of HunG and related large-subunit hydrogenases from group 4.** **A:** Maximum likelihood HunG/NuoD/HycE phylogeny, with [Ni-Fe] hydrogenase group 4 labels drawn based on naming system from Søndergaard et al. (2016) and L1 and L2 motifs for the large subunit metal-binding centers for each class of group 4 hydrogenase. The NuoD subunit of NADH dehydrogenase (Complex I), which evolved from group 4 hydrogenase (Schut et al., 2016), is also included. **B:** Sequence similarity network for Group 4a,b,c,d,e,f,g and HunG hydrogenases with E-value cutoff of  $10^{-90}$  and group color scheme the same as in A. Subgroups 4h and 4i are not shown in the sequence similarity network because they had no edges to the larger Group 4 cluster at E-value cutoff of  $10^{-90}$ .



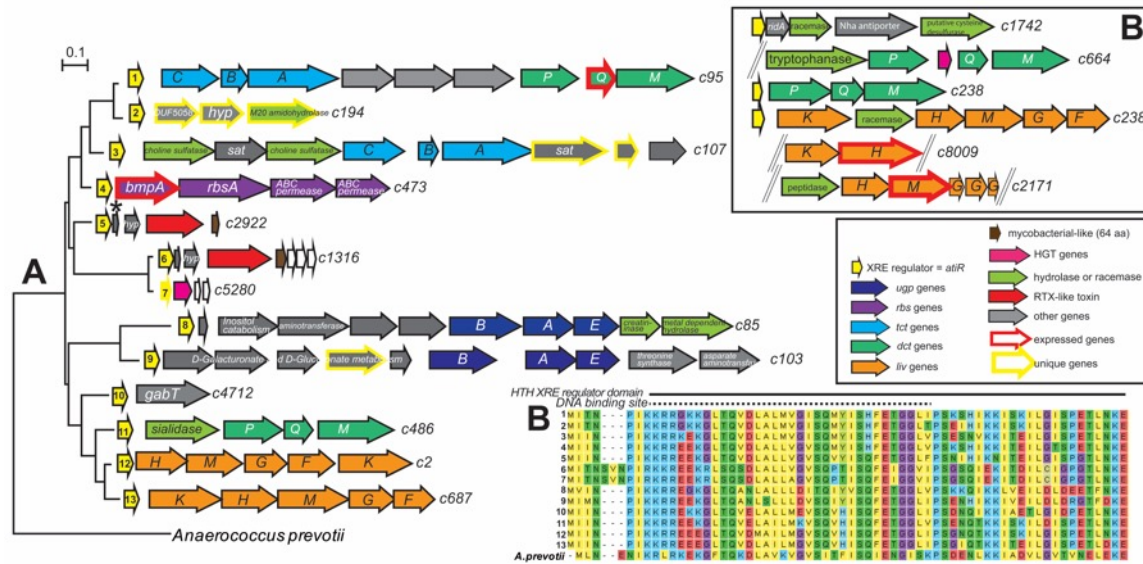

513  
 514 **Figure 5: Phylogeny of helix-turn-helix xenobiotic response element regulators (yellow),**  
 515 **hereafter “AtiR”, from B2 and synteny of downstream genes.** Genes highlighted in thick red  
 516 lines were expressed in the metaproteome. **A:** AtiR maximum likelihood phylogeny based on  
 517 contigs (labeled on the right) from E10-H5 B2, with *Anaerococcus prevotii* as the outgroup. **Top**  
 518 **inset:** Additional putative operons from B2 likely regulated by *atiR*, which is truncated partially or  
 519 completely on these contigs. **Bottom inset:** Legend for panels A and B; **B:** AtiR amino acid  
 520 alignment for the N-terminus of 13 AtiR sequences from *Atribacteria* E10-H5-B2 shown in panel  
 521 A. Abbreviations: *bmpA*: basic membrane protein A; *dctPQM*: C4-dicarboxylate transporter; *gabT*:  
 522 4-aminobutyrate aminotransferase; *livHMGF*: branched chain amino acid transporter; *rbs*: ribose  
 523 transporter; *sat*: sulfate adenylyltransferase; *tctCBA*: tricarboxylate transporter; *ugpBAE*: sn-  
 524 glycerol-3-phosphate transporter. See Table S6 for accession numbers and % identity to closest  
 525 gene hits in other genomes.

526 **References**

- 527 Amir, A., McDonald, D., Navas-Molina, J.A., Kopylova, E., Morton, J.T., Xu, Z.Z. et al.  
528 (2017) Deblur rapidly resolves single-nucleotide community sequence patterns. *MSystems*  
529 **2**.
- 530 Archer, D., Buffett, B., and Brovkin, V. (2009) Ocean methane hydrates as a slow tipping  
531 point in the global carbon cycle. *Proc Natl Acad Sci* **106**: 20596-20601.
- 532 Aromokeye, D.A., Oni, O.E., Tebben, J., Yin, X., Richter-Heitmann, T., Wendt, J. et al.  
533 (2020) Crystalline iron oxides stimulate methanogenic benzoate degradation in marine  
534 sediment-derived enrichment cultures. *The ISME Journal* **15**: 1-16.
- 535 Axen, S.D., Erbilgin, O., and Kerfeld, C.A. (2014) A taxonomy of bacterial  
536 microcompartment loci constructed by a novel scoring method. *PLoS Comput Biol* **10**:  
537 e1003898.
- 538 Bergkessel, M., Basta, D.W., and Newman, D.K. (2016) The physiology of growth arrest:  
539 uniting molecular and environmental microbiology. *Nature Reviews Microbiology* **14**: 549.
- 540 Bird, J.T., Tague, E.D., Zinke, L., Schmidt, J.M., Steen, A.D., Reese, B. et al. (2019)  
541 Uncultured microbial phyla suggest mechanisms for multi-thousand-year subsistence in  
542 Baltic Sea sediments. *Mbio* **10**: e02376-02318.
- 543 Blazejak, A., and Schippers, A. (2010) High abundance of JS-1-and Chloroflexi-related  
544 Bacteria in deeply buried marine sediments revealed by quantitative, real-time PCR. *FEMS*  
545 *Microbiology Ecology* **72**: 198-207.
- 546 Bohrmann, G., and Torres, M.E. (2006) Gas Hydrates in Marine Sediments. In *Marine*  
547 *Geochemistry*. Schulz, H.D., and Zabel, M. (eds). Berlin, Heidelberg: Springer, pp. 481-  
548 512.
- 549 Caporaso, J.G., Lauber, C.L., Walters, W.A., Berg-Lyons, D., Lozupone, C.A., Turnbaugh,  
550 P.J. et al. (2011) Global patterns of 16S rRNA diversity at a depth of millions of sequences  
551 per sample. *Proc Natl Acad Sci* **108**: 4516-4522.
- 552 Carr, S.A., Orcutt, B.N., Mandernack, K.W., and Spear, J.R. (2015) Abundant Atribacteria  
553 in deep marine sediment from the Adelie Basin, Antarctica. *Front Microbiol* **6**: 872.
- 554 Chakraborty, A., Ruff, S., Dong, X., Ellefson, E., Li, C., Brooks, J. et al. (2020)  
555 Hydrocarbon seepage in the deep seabed links subsurface and seafloor biospheres. *Proc*  
556 *Natl Acad Sci* **117**: 11029-11037.
- 557 Chernitsyna, S., Mamaeva, E., Lomakina, A., Pogodaeva, T., Galach'yants, Y.P., Bukin,  
558 S. et al. (2016) Phylogenetic diversity of microbial communities of the Posolsk Bank  
559 bottom sediments, Lake Baikal. *Microbiology* **85**: 672-680.

- 560 Collett, T., Bahk, J.-J., Baker, R., Boswell, R., Divins, D., Frye, M. et al. (2015) Methane  
561 Hydrates in Nature □ Current Knowledge and Challenges. *Journal of chemical &*  
562 *engineering data* **60**: 319-329.
- 563 Culviner, P.H., and Laub, M.T. (2018) Global analysis of the E. coli toxin MazF reveals  
564 widespread cleavage of mRNA and the inhibition of rRNA maturation and ribosome  
565 biogenesis. *Molecular cell* **70**: 868-880. e810.
- 566 Daly, R.A., Borton, M.A., Wilkins, M.J., Hoyt, D.W., Kountz, D.J., Wolfe, R.A. et al.  
567 (2016) Microbial metabolisms in a 2.5-km-deep ecosystem created by hydraulic fracturing  
568 in shales. *Nat Microbiol* **1**: 16146.
- 569 Dodsworth, J.A., Blainey, P.C., Murugapiran, S.K., Swingley, W.D., Ross, C.A., Tringe,  
570 S.G. et al. (2013) Single-cell and metagenomic analyses indicate a fermentative and  
571 saccharolytic lifestyle for members of the OP9 lineage. *Nat Commun* **4**: 1854.
- 572 Dong, X., Greening, C., Rattray, J.E., Chakraborty, A., Chuvochina, M., Mayumi, D. et al.  
573 (2019) Metabolic potential of uncultured bacteria and archaea associated with petroleum  
574 seepage in deep-sea sediments. *Nature communications* **10**: 1-12.
- 575 Eng, J.K., Jahan, T.A., and Hoopmann, M.R. (2013) Comet: an open - source MS/MS  
576 sequence database search tool. *Proteomics* **13**: 22-24.
- 577 Eng, J.K., Hoopmann, M.R., Jahan, T.A., Egertson, J.D., Noble, W.S., and MacCoss, M.J.  
578 (2015) A deeper look into Comet—implementation and features. *J Am Soc Mass Spec* **26**:  
579 1865-1874.
- 580 Fischer, M., Hopkins, A.P., Severi, E., Hawkhead, J., Bawdon, D., Watts, A.G. et al. (2015)  
581 Tripartite ATP-independent periplasmic (TRAP) transporters use an arginine-mediated  
582 selectivity filter for high affinity substrate binding. *J Biol Chem* **290**: 27113-27123.
- 583 Fry, J.C., Parkes, R.J., Cragg, B.A., Weightman, A.J., and Webster, G. (2008) Prokaryotic  
584 biodiversity and activity in the deep subseafloor biosphere. *FEMS Microbiol Ecol* **66**: 181-  
585 196.
- 586 Gies, E.A., Konwar, K.M., Beatty, J.T., and Hallam, S.J. (2014) Illuminating microbial  
587 dark matter in meromictic Sakinaw Lake. *Appl Environ Microbiol* **80**: 6807-6818.
- 588 Greening, C., Biswas, A., Carere, C.R., Jackson, C.J., Taylor, M.C., Stott, M.B. et al.  
589 (2016) Genomic and metagenomic surveys of hydrogenase distribution indicate H<sub>2</sub> is a  
590 widely utilised energy source for microbial growth and survival. *The ISME journal* **10**:  
591 761-777.
- 592 Gründger, F., Carrier, V., Svenning, M.M., Panieri, G., Vonnahme, T.R., Klasek, S., and  
593 Niemann, H. (2019) Methane-fuelled biofilms predominantly composed of methanotrophic  
594 ANME-1 in Arctic gas hydrate-related sediments. *Scientific reports* **9**: 1-10.

- 595 HERNSDORF, A.W., AMANO, Y., MIYAKAWA, K., ISE, K., SUZUKI, Y., ANANTHARAMAN, K. et al.  
596 (2017) Potential for microbial H<sub>2</sub> and metal transformations associated with novel bacteria  
597 and archaea in deep terrestrial subsurface sediments. *ISME J* **11**: 1915-1929.
- 598 HESTER, K.C., and BREWER, P.G. (2009) Clathrate hydrates in nature. *Ann Rev Mar Sci* **1**:  
599 303-327.
- 600 HONKALAS, V., DABIR, A., and DHAKEPHALKAR, P.K. (2016) Life in the Anoxic Sub-Sea-floor  
601 Environment: Linking Microbial Metabolism and Mega Reserves of Methane Hydrate. In  
602 *Anaerobes in Biotechnology*. Hatti-Kaul, R., Mamo, G., and Mattiasson, B. (eds). Cham:  
603 Springer, pp. 235-262.
- 604 HOSHINO, T., TOKI, T., IJIRI, A., MORONO, Y., MACHIYAMA, H., ASHI, J. et al. (2017)  
605 Atribacteria from the subseafloor sedimentary biosphere disperse to the hydrosphere  
606 through submarine mud volcanoes. *Front Microbiol* **8**: 1135.
- 607 HOSHINO, T., DOI, H., URAMOTO, G.-I., WÖRMER, L., ADHIKARI, R.R., XIAO, N. et al. (2020)  
608 Global diversity of microbial communities in marine sediment. *Proceedings of the*  
609 *National Academy of Sciences*.
- 610 HU, P., TOM, L., SINGH, A., THOMAS, B.C., BAKER, B.J., PICENO, Y.M. et al. (2016) Genome-  
611 resolved metagenomic analysis reveals roles for candidate phyla and other microbial  
612 community members in biogeochemical transformations in oil reservoirs. *mBio* **7**: e01669-  
613 01615.
- 614 INAGAKI, F., SUZUKI, M., TAKAI, K., OIDA, H., SAKAMOTO, T., AOKI, K. et al. (2003) Microbial  
615 communities associated with geological horizons in coastal subseafloor sediments from the  
616 Sea of Okhotsk. *Appl Environ Microbiol* **69**: 7224-7235.
- 617 INAGAKI, F., NUNOURA, T., NAKAGAWA, T., TESKE, A., LEVER, M.A., LAUER, A. et al. (2006)  
618 Biogeographical distribution and diversity of microbes in methane hydrate-bearing deep  
619 marine sediments on the Pacific Ocean Margin. *Proc Natl Acad Sci* **103**: 2815–2820.
- 620 JOHNSON, A.M., HUARD, D.J., KIM, J., RAUT, P., DAI, S., LIEBERMAN, R.L., and GLASS, J.B.  
621 (2020) Mainly on the Plane: Deep Subsurface Bacterial Proteins Bind and Alter Clathrate  
622 Structure. *Crystal Growth & Design*.
- 623 KADNIKOV, V.V., MARDANOV, A.V., BELETSKY, A.V., SHUBENKOVA, O.V., POGODAIEVA, T.V.,  
624 ZEMSKAYA, T.I. et al. (2012) Microbial community structure in methane hydrate-bearing  
625 sediments of freshwater Lake Baikal. *FEMS Microbiol Ecol* **79**: 348-358.
- 626 KAMATA, S., NIMMO, F., SEKINE, Y., KURAMOTO, K., NOGUCHI, N., KIMURA, J., and TANI, A.  
627 (2019) Pluto's ocean is capped and insulated by gas hydrates. *Nature Geoscience* **12**: 407-  
628 410.
- 629 KANG, D.D., FROULA, J., EGAN, R., and WANG, Z. (2015) MetaBAT, an efficient tool for  
630 accurately reconstructing single genomes from complex microbial communities. *PeerJ* **3**:  
631 e1165.

- 632 Kastner, M., Kvenvolden, K.A., and Lorenson, T.D. (1998) Chemistry, isotopic  
633 composition, and origin of a methane-hydrogen sulfide hydrate at the Cascadia subduction  
634 zone. *Earth and Planetary Science Letters* **156**: 173-183.
- 635 Katayama, T., Nobu, M.K., Kusada, H., Meng, X.-Y., Yoshioka, H., Kamagata, Y., and  
636 Tamaki, H. (2020) Isolation of a member of the candidate phylum ‘Atribacteria’ reveals a  
637 unique cell membrane structure. *Nature Communications* **11**: 6381.
- 638 Katoh, K., and Standley, D.M. (2013) MAFFT multiple sequence alignment software  
639 version 7: improvements in performance and usability. *Molecular biology and evolution*  
640 **30**: 772-780.
- 641 Kawai, M., Futagami, T., Toyoda, A., Takaki, Y., Nishi, S., Hori, S. et al. (2014) High  
642 frequency of phylogenetically diverse reductive dehalogenase-homologous genes in deep  
643 subseafloor sedimentary metagenomes. *Frontiers in microbiology* **5**: 80.
- 644 Keller, A., Purvine, S., Nesvizhskii, A.I., Stolyar, S., Goodlett, D.R., and Kolker, E. (2002)  
645 Experimental protein mixture for validating tandem mass spectral analysis. *OMICS* **6**: 207-  
646 212.
- 647 Kho, K., and Meredith, T.C. (2018) Salt-induced stress stimulates a lipoteichoic acid-  
648 specific three component glycosylation system in *Staphylococcus aureus*. *J Bacteriol* **200**:  
649 e00017-00018.
- 650 Kormas, K.A., Smith, D.C., Edgcomb, V., and Teske, A. (2003) Molecular analysis of deep  
651 subsurface microbial communities in Nankai Trough sediments (ODP Leg 190, Site 1176).  
652 *FEMS Microbiol Ecol* **45**: 115-125.
- 653 Kozich, J.J., Westcott, S.L., Baxter, N.T., Highlander, S.K., and Schloss, P.D. (2013)  
654 Development of a dual-index sequencing strategy and curation pipeline for analyzing  
655 amplicon sequence data on the MiSeq Illumina sequencing platform. *Appl Environ*  
656 *Microbiol* **79**: 5112-5120.
- 657 Kvenvolden, K.A. (1993) A primer on gas hydrates. *US Geological Survey professional*  
658 *paper* **1570**: 279-291.
- 659 Langmead, B., and Salzberg, S.L. (2012) Fast gapped-read alignment with Bowtie 2.  
660 *Nature methods* **9**: 357.
- 661 Lanoil, B.D., Sassen, R., La Duc, M.T., Sweet, S.T., and Nealson, K.H. (2001) Bacteria  
662 and Archaea physically associated with Gulf of Mexico gas hydrates. *Appl Environ*  
663 *Microbiol* **67**: 5143-5153.
- 664 Lee, Y.M., Hwang, K., Lee, J.I., Kim, M., Hwang, C.Y., Noh, H.-J. et al. (2018) Genomic  
665 insight into the predominance of candidate phylum *Atribacteria* JS1 lineage in marine  
666 sediments. *Front Microbiol* **9**: 2909.



- 667 Li, T., and Wang, P. (2013) Biogeographical distribution and diversity of bacterial  
668 communities in surface sediments of the South China Sea. *J Microbiol Biotechnol* **23**: 602-  
669 613.
- 670 Lin, L.-H., Wu, L.-W., Cheng, T.-W., Tu, W.-X., Lin, J.-R., Yang, T.F. et al. (2014)  
671 Distributions and assemblages of microbial communities along a sediment core retrieved  
672 from a potential hydrate-bearing region offshore southwestern Taiwan. *J Asian Earth Sci*  
673 **92**: 276-292.
- 674 Liu, Y.-F., Qi, Z.-Z., Shou, L.-B., Liu, J.-F., Yang, S.-Z., Gu, J.-D., and Mu, B.-Z. (2019)  
675 Anaerobic hydrocarbon degradation in candidate phylum ‘Atribacteria’ (JS1) inferred from  
676 genomics. *The ISME Journal* **13**: 2377-2390.
- 677 López-Marqués, R.L., Pérez-Castiñeira, J.R., Losada, M., and Serrano, A. (2004)  
678 Differential regulation of soluble and membrane-bound inorganic pyrophosphatases in the  
679 photosynthetic bacterium *Rhodospirillum rubrum* provides insights into pyrophosphate-  
680 based stress bioenergetics. *Journal of bacteriology* **186**: 5418-5426.
- 681 Mazurenko, L., and Soloviev, V. (2003) Worldwide distribution of deep-water fluid  
682 venting and potential occurrences of gas hydrate accumulations. *Geo-Marine Letters* **23**:  
683 162-176.
- 684 McMurdie, P.J., and Holmes, S. (2013) phyloseq: an R package for reproducible interactive  
685 analysis and graphics of microbiome census data. *PloS one* **8**: e61217.
- 686 Milkov, A.V., Dickens, G.R., Claypool, G.E., Lee, Y.-J., Borowski, W.S., Torres, M.E. et al.  
687 (2004) Co-existence of gas hydrate, free gas, and brine within the regional gas hydrate  
688 stability zone at Hydrate Ridge (Oregon margin): evidence from prolonged degassing of a  
689 pressurized core. *Earth Planet Sci Lett* **222**: 829-843.
- 690 Mousis, O., Chassefiere, E., Holm, N.G., Bouquet, A., Waite, J.H., Geppert, W.D. et al.  
691 (2015) Methane clathrates in the solar system. *Astrobiology* **15**: 308-326.
- 692 Nayfach, S., and Pollard, K.S. (2015) Average genome size estimation improves  
693 comparative metagenomics and sheds light on the functional ecology of the human  
694 microbiome. *Genome Biology* **16**: 51.
- 695 Nesvizhskii, A.I., Keller, A., Kolker, E., and Aebersold, R. (2003) A statistical model for  
696 identifying proteins by tandem mass spectrometry. *Anal Chem* **75**: 4646-4658.
- 697 Newberry, C.J., Webster, G., Cragg, B.A., Parkes, R.J., Weightman, A.J., and Fry, J.C.  
698 (2004) Diversity of prokaryotes and methanogenesis in deep subsurface sediments from  
699 the Nankai Trough, Ocean Drilling Program Leg 190. *Environ Microbiol* **6**: 274-287.
- 700 Nicora, C.D., Anderson, B.J., Callister, S.J., Norbeck, A.D., Purvine, S.O., Jansson, J.K.  
701 et al. (2013) Amino acid treatment enhances protein recovery from sediment and soils for  
702 metaproteomic studies. *Proteomics* **13**: 2776-2785.

- 703 Niemann, H., Lösekann, T., De Beer, D., Elvert, M., Nadalig, T., Knittel, K. et al. (2006)  
704 Novel microbial communities of the Haakon Mosby mud volcano and their role as a  
705 methane sink. *Nature* **443**: 854-858.
- 706 Nobu, M.K., Narihiro, T., Rinke, C., Kamagata, Y., Tringe, S.G., Woyke, T., and Liu, W.-  
707 T. (2015) Microbial dark matter ecogenomics reveals complex synergistic networks in a  
708 methanogenic bioreactor. *ISME J* **9**: 1710-1722.
- 709 Nobu, M.K., Dodsworth, J.A., Murugapiran, S.K., Rinke, C., Gies, E.A., Webster, G. et al.  
710 (2016) Phylogeny and physiology of candidate phylum ‘Atribacteria’ (OP9/JS1) inferred  
711 from cultivation-independent genomics. *ISME J* **10**: 273-286.
- 712 Orsi, W.D., Richards, T.A., and Francis, W.R. (2018) Predicted microbial secretomes and  
713 their target substrates in marine sediment. *Nature microbiology* **3**: 32-37.
- 714 Ostasiewicz, P., Zielinska, D.F., Mann, M., and Wiśniewski, J.R. (2010) Proteome,  
715 phosphoproteome, and N-glycoproteome are quantitatively preserved in formalin-fixed  
716 paraffin-embedded tissue and analyzable by high-resolution mass spectrometry. *J Prot Res*  
717 **9**: 3688-3700.
- 718 Parkes, R.J., Cragg, B., Roussel, E., Webster, G., Weightman, A., and Sass, H. (2014) A  
719 review of prokaryotic populations and processes in sub-seafloor sediments, including  
720 biosphere: geosphere interactions. *Mar Geol* **352**: 409-425.
- 721 Parks, D.H., Imelfort, M., Skennerton, C.T., Hugenholtz, P., and Tyson, G.W. (2015)  
722 CheckM: assessing the quality of microbial genomes recovered from isolates, single cells,  
723 and metagenomes. *Genome Res* **25**: 1043-1055.
- 724 Pedrioli, P.G. (2010) Trans-Proteomic Pipeline: A Pipeline for Proteomic Analysis. In  
725 *Proteome Bioinformatics*. Hubbard, S., and Jones, A. (eds): Humana Press, pp. 213-238.
- 726 Peoples, L.M., Grammatopoulou, E., Pombrol, M., Xu, X., Osuntokun, O., Blanton, J. et  
727 al. (2019) Microbial community diversity within sediments from two geographically  
728 separated hadal trenches. *Frontiers in microbiology* **10**: 347.
- 729 Reed, D.W., Fujita, Y., Delwiche, M.E., Blackwelder, D.B., Sheridan, P.P., Uchida, T.,  
730 and Colwell, F.S. (2002) Microbial communities from methane hydrate-bearing deep  
731 marine sediments in a forearc basin. *Appl Environ Microbiol* **68**: 3759-3770.
- 732 Rinke, C., Schwientek, P., Sczyrba, A., Ivanova, N.N., Anderson, I.J., Cheng, J.-F. et al.  
733 (2013) Insights into the phylogeny and coding potential of microbial dark matter. *Nature*  
734 **499**: 431-437.
- 735 Rodriguez-R, L.M., and Konstantinidis, K.T. (2016) The enveomics collection: a toolbox  
736 for specialized analyses of microbial genomes and metagenomes. In: PeerJ Preprints.
- 737 Rosa, L.T., Bianconi, M.E., Thomas, G.H., and Kelly, D.J. (2018) Tripartite ATP-  
738 independent periplasmic (TRAP) transporters and tripartite tricarboxylate transporters



- 739 (TTT): from uptake to pathogenicity. *Frontiers in cellular and infection microbiology* **8**:  
740 33.
- 741 Roy, M., McManus, J., Goni, M.A., Chase, Z., Borgeld, J.C., Wheatcroft, R.A. et al. (2013)  
742 Reactive iron and manganese distributions in seabed sediments near small mountainous  
743 rivers off Oregon and California (USA). *Cont Shelf Res* **54**: 67-79.
- 744 Ruff, S., Felden, J., Gruber-Vodicka, H., Marcon, Y., Knittel, K., Ramette, A., and Boetius,  
745 A. (2019) In situ development of a methanotrophic microbiome in deep-sea sediments. *The*  
746 *ISME journal* **13**: 197.
- 747 Ruppel, C.D., and Kessler, J.D. (2017) The interaction of climate change and methane  
748 hydrates. *Rev Geophys* **55**: 126-168.
- 749 Santos, H., and Da Costa, M.S. (2002) Compatible solutes of organisms that live in hot  
750 saline environments. *Environ Microbiol* **4**: 501-509.
- 751 Schut, G.J., Zadvornyy, O., Wu, C.-H., Peters, J.W., Boyd, E.S., and Adams, M.W. (2016)  
752 The role of geochemistry and energetics in the evolution of modern respiratory complexes  
753 from a proton-reducing ancestor. *Biochimica et Biophysica Acta (BBA)-Bioenergetics*  
754 **1857**: 958-970.
- 755 ShipboardScientificParty (2003) Site 1244. In *Proc ODP, Init Repts, 204*. Tréhu, A.,  
756 Bohrmann, G., Rack, F., Torres, M., and al., e. (eds). College Station, TX: Ocean Drilling  
757 Program, pp. 1–132 doi:10.2973/odp.proc.ir.2204.2103.2003.
- 758 Snyder, G.T., Matsumoto, R., Suzuki, Y., Kouduka, M., Kakizaki, Y., Zhang, N. et al.  
759 (2020) Evidence in the Japan Sea of microdolomite mineralization within gas hydrate  
760 microbiomes. *Scientific reports* **10**: 1-13.
- 761 Søndergaard, D., Pedersen, C.N., and Greening, C. (2016) HydDB: a web tool for  
762 hydrogenase classification and analysis. *Scientific reports* **6**: 1-8.
- 763 Tréhu, A., Bohrmann, G., Rack, F., and Torres, M. (2003) Volume 204 Initial Reports. In  
764 *Proc ODP, Initial Reports*, pp. 77845-79547.
- 765 Tréhu, A.M., Long, P.E., Torres, M.E., Bohrmann, G., Rack, F.R., Collett, T.S. et al. (2004)  
766 Three-dimensional distribution of gas hydrate beneath southern Hydrate Ridge: constraints  
767 from ODP Leg 204. *Earth and Planetary Science Letters* **222**: 845-862.
- 768 Tsai, J.-Y., Kellosalo, J., Sun, Y.-J., and Goldman, A. (2014) Proton/sodium pumping  
769 pyrophosphatases: the last of the primary ion pumps. *Current opinion in structural biology*  
770 **27**: 38-47.
- 771 Ussler III, W., and Paull, C.K. (2001) Ion exclusion associated with marine gas hydrate  
772 deposits. In *Natural Gas Hydrates: Occurrence, Distribution, and Detection*. Paull, C.K.,  
773 and Dillion, W.P. (eds): American Geophysical Union.

- 774 Vetting, M.W., Al-Obaidi, N., Zhao, S., San Francisco, B., Kim, J., Wichelecki, D.J. et al.  
775 (2015) Experimental strategies for functional annotation and metabolism discovery:  
776 targeted screening of solute binding proteins and unbiased panning of metabolomes.  
777 *Biochemistry* **54**: 909-931.
- 778 Vizcaíno, J.A., Csordas, A., Del-Toro, N., Dianes, J.A., Griss, J., Lavidas, I. et al. (2015)  
779 2016 update of the PRIDE database and its related tools. *Nuc Acid Res* **44**: D447-D456.
- 780 Vuillemin, A., Vargas, S., Coskun, Ö.K., Pockalny, R., Murray, R.W., Smith, D.C. et al.  
781 (2020) Atribacteria reproducing over millions of years in the Atlantic abyssal seafloor.  
782 *mBio* **11**.
- 783 Wattam, A.R., Abraham, D., Dalay, O., Disz, T.L., Driscoll, T., Gabbard, J.L. et al. (2014)  
784 PATRIC, the bacterial bioinformatics database and analysis resource. *Nucleic acids*  
785 *research* **42**: D581-D591.
- 786 Webster, G., Parkes, R.J., Fry, J.C., and Weightman, A.J. (2004) Widespread occurrence  
787 of a novel division of bacteria identified by 16S rRNA gene sequences originally found in  
788 deep marine sediments. *Appl Environ Microbiol* **70**: 5708-5713.
- 789 Webster, G., Yarram, L., Freese, E., Koster, J., Sass, H., Parkes, R.J., and Weightman, A.J.  
790 (2007) Distribution of candidate division JS1 and other Bacteria in tidal sediments of the  
791 German Wadden Sea using targeted 16S rRNA gene PCR-DGGE. *FEMS Microbiol Ecol*  
792 **62**: 78-89.
- 793 Whiticar, M.J., Hovland, M., Kastner, M., and Sample, J.C. (1995) 26. ORGANIC  
794 GEOCHEMISTRY OF GASES, FLUIDS, AND HYDRATES AT THE CASCADIA  
795 ACCRETIONARY MARGIN. In *Proceedings of the Ocean Drilling Program, Scientific*  
796 *Results*.
- 797 Wood, J.M. (2015) Bacterial responses to osmotic challenges. *J Gen Physiol* **145**: 381-388.
- 798 Yanagawa, K., Kouduka, M., Nakamura, Y., Hachikubo, A., Tomaru, H., and Suzuki, Y.  
799 (2014) Distinct microbial communities thriving in gas hydrate-associated sediments from  
800 the eastern Japan Sea. *Journal of Asian Earth Sciences* **90**: 243-249.
- 801 Yarza, P., Yilmaz, P., Pruesse, E., Glöckner, F.O., Ludwig, W., Schleifer, K.-H. et al.  
802 (2014) Uniting the classification of cultured and uncultured bacteria and archaea using 16S  
803 rRNA gene sequences. *Nat Rev Microbiol* **12**: 635-645.
- 804 Zallot, R., Oberg, N., and Gerlt, J.A. (2019) The EFI web resource for genomic  
805 enzymology tools: leveraging protein, genome, and metagenome databases to discover  
806 novel enzymes and metabolic pathways. *Biochemistry* **58**: 4169-4182.
- 807 Zhou, Z., Liu, Y., Xu, W., Pan, J., Luo, Z.-H., and Li, M. (2020) Genome-and community-  
808 level interaction insights into carbon utilization and element cycling functions of  
809 Hydrothermarchaeota in hydrothermal sediment. *Msystems* **5**.
- 810
