# Supplementary material for: Microbial metabolism and adaptations in Atribacteria-dominated methane hydrate sediments
Source: bioRxiv or medRxiv preprint supplement (doi:10.1101/536078), 2021-06-14
Supplement: Supplementary file [file media-1.pdf]

1 **Supplemental Materials**

2 **Adaptations of Atribacteria to life in methane hydrates: hot traits for cold life**

3 **Authors:** Jennifer B. Glass<sup>1\*</sup>, Piyush Ranjan<sup>2\*</sup>, Cecilia B. Kretz<sup>1#</sup>, Brook L. Nunn<sup>3</sup>, Abigail M. Johnson<sup>1</sup>, James McManus<sup>4</sup>, Frank J. Stewart<sup>2</sup>

4 **Affiliations:**

5 <sup>1</sup>School of Earth and Atmospheric Sciences, Georgia Institute of Technology, Atlanta, GA, USA

6 <sup>2</sup>School of Biological Sciences, Georgia Institute of Technology, Atlanta, GA, USA

7 <sup>3</sup>Department of Genome Sciences, University of Washington, Seattle, WA

8 <sup>4</sup>Bigelow Laboratory for Ocean Sciences, East Boothbay, ME, USA

9

10 <sup>#</sup>Now at: Division of Bacterial Diseases, National Center for Immunization and Respiratory Diseases, Centers for Disease Control and Prevention,  
11 Atlanta, Georgia, USA

12 \*Correspondence to: [jennifer.glass@eas.gatech.edu](mailto:jennifer.glass@eas.gatech.edu)

13 **Dedication:** To Katrina Edwards

14

15 **Table S1.** Additional geochemical data for ODP Site 1244 at Hydrate Ridge drilled on IODP Leg 204.

16 See **Fig. 1** for methane, sulfate, manganese, iron, and iodide concentrations.

17

| Hole  | Depth (mbsf) | %TC  | %TN  | %TS  | %TIC | %TOC | C:N   | %CaCO <sub>3</sub> | reactive Fe (%) | reactive Mn (%) |
|-------|--------------|------|------|------|------|------|-------|--------------------|-----------------|-----------------|
| C1H2  | 1.95/2.25    | 2.07 | 0.2  | 0.42 | 0.17 | 1.9  | 11.05 | 1.46               | 0.38            | 0.002           |
| C1H3  | 3.45/3.75    | 1.88 | 0.14 | 0.55 | 0.70 | 1.2  | 9.85  | 5.81               | 0.45            | 0.004           |
| F2H4  | 8.6          | 1.54 | 0.17 | 0.39 | 0.44 | 1.1  | 7.55  | 3.66               | 0.57            | 0.005           |
| F3H4  | 18.1         | 1.55 | 0.24 | 0.64 | 0.08 | 1.5  | 7.14  | 0.68               | 0.80            | 0.004           |
| C3H4  | 20.69        | 1.22 | 0.18 | 0.22 | 0.08 | 1.1  | 7.40  | 0.65               | 1.10            | 0.004           |
| E10H5 | 68.55        | 1.71 | 0.22 | 0.42 | 0.13 | 1.6  | 8.38  | 1.08               | 0.51            | 0.003           |
| E19H5 | 138.89       | 1.42 | 0.20 | 0.07 | 0.51 | 0.9  | 5.32  | 4.23               | 1.41            | 0.012           |

18

19  
20

**Table S2. Atribacteria OTUs in E10-H5 sediment sample (69 mbsf, in the GHSZ) that comprised >0.1% of total Atribacteria OTUs.**

| <b>OTU Name</b>      | <b>Representative Sequence</b> | <b>GenBank ID</b> | <b>Top Hit Sampling Location</b>                                                                         | <b>Absolute Abundance</b> | <b>Relative Abundance (Atribacteria)</b> |
|----------------------|--------------------------------|-------------------|----------------------------------------------------------------------------------------------------------|---------------------------|------------------------------------------|
| E10H5-AtriRepOTU-007 | E10H5_60                       | AB804573.1        | Ocean drilling sample, offshore Shimokita Peninsula, Japan                                               | 197,371                   | 68.6                                     |
| E10H5-AtriRepOTU-023 | E10H5_1989                     | JF495341.1        | Anoxic fjord sediments                                                                                   | 6861                      | 2.4                                      |
| E10H5-AtriRepOTU-027 | E10H5_2961                     | KM269692.1        | Marine sediment                                                                                          | 1096                      | 0.4                                      |
| E10H5-AtriRepOTU-015 | E10H5_3277                     | AB805815.1        | Ocean drilling sample, offshore Shimokita Peninsula, Japan                                               | 1083                      | 0.4                                      |
| E10H5-AtriRepOTU-024 | E10H5_2423                     | JF495354.1        | Anoxic fjord sediments                                                                                   | 939                       | 0.3                                      |
| E10H5-AtriRepOTU-021 | E10H5_24232                    | JF495353.1        | Anoxic fjord sediments                                                                                   | 833                       | 0.2                                      |
| E10H5-AtriRepOTU-010 | E10H5_4352                     | EF687467.1        | Sediment underneath an iron-oxidizing mat, Chefren mud volcano, Nile Deep Sea Fan, Eastern Mediterranean | 668                       | 0.2                                      |
| E10H5-AtriRepOTU-016 | E10H5_1096                     | GU553715.1        | Subseafloor sediment, Yung-An Ridge, gas hydrate potential field, Taiwan                                 | 536                       | 0.2                                      |
| E10H5-AtriRepOTU-039 | E10H5_13741                    | JX001059.1        | Subseafloor sediment at the deformation front, gas hydrate potential field, Taiwan                       | 450                       | 0.2                                      |
| E10H5-AtriRepOTU-043 | E10H5_16732                    | KM356487.1        | Hydrate Ridge, Oregon                                                                                    | 442                       | 0.2                                      |
| E10H5-AtriRepOTU-037 | E10H5_3220                     | JQ816843.1        | Subseafloor sediment, Yung-An Ridge, gas hydrate potential field, Taiwan                                 | 313                       | 0.1                                      |
| E10H5-AtriRepOTU-031 | E10H5_11380                    | KM356401.1        | Hydrate Ridge, Oregon                                                                                    | 212                       | 0.1                                      |

21  
22  
23  
24  
25

26 **Table S3.** Metagenome sequence statistics. All statistics are based on contigs of size  $\geq 500$  bp, unless otherwise noted (e.g., "#  
 27 contigs ( $\geq 0$  bp)" and "Total length ( $\geq 0$  bp)" include all contigs).

|                                     | C1H2-contigs | C1H3-contigs | C3H4-contigs | E10H5-contigs | E19H5-contigs | E5H5-contigs | F2H4-contigs | F3H4-contigs |
|-------------------------------------|--------------|--------------|--------------|---------------|---------------|--------------|--------------|--------------|
| # contigs ( $\geq 0$ bp)            | 95150        | 360783       | 191608       | 50209         | 27713         | 210768       | 127188       | 63852        |
| # contigs ( $\geq 1000$ bp)         | 20047        | 61637        | 37768        | 12138         | 5361          | 42010        | 21629        | 14467        |
| Total length ( $\geq 0$ bp)         | 86071151     | 271255728    | 168175282    | 48985505      | 30387546      | 175406954    | 99776174     | 69472077     |
| Total length ( $\geq 1000$ bp)      | 55876587     | 150001556    | 105618381    | 33498337      | 21662818      | 105488664    | 57427902     | 49557755     |
| # contigs                           | 35768        | 126717       | 71801        | 21052         | 9651          | 82530        | 43665        | 25258        |
| Largest contig                      | 73528        | 47315        | 349313       | 40997         | 241892        | 43171        | 103744       | 232470       |
| Total length                        | 66908509     | 195416623    | 129426606    | 39796035      | 24667348      | 133920418    | 72810367     | 57141798     |
| GC (%)                              | 43.14        | 45.35        | 44.21        | 41.27         | 44.79         | 45.97        | 40.15        | 38.38        |
| N50                                 | 2605         | 2041         | 2638         | 2777          | 5514          | 2209         | 2330         | 3953         |
| N75                                 | 1337         | 1051         | 1242         | 1366          | 1815          | 1114         | 1127         | 1600         |
| L50                                 | 6125         | 24423        | 11911        | 3865          | 946           | 15482        | 7511         | 3324         |
| L75                                 | 15123        | 58282        | 30099        | 9002          | 2977          | 37226        | 18969        | 9170         |
| # N's per 100 kbp                   | 0.00         | 0.00         | 0.00         | 0.00          | 0.00          | 0.00         | 0.00         | 0.00         |
| # predicted genes (unique)          | 91393        | 277467       | 174749       | 53499         | 26195         | 186583       | 100958       | 73188        |
| # predicted genes ( $\geq 0$ bp)    | 91882        | 277905       | 175191       | 53668         | 26316         | 186919       | 101224       | 73764        |
| # predicted genes ( $\geq 300$ bp)  | 58546        | 194181       | 125284       | 36792         | 15914         | 131069       | 71029        | 52112        |
| # predicted genes ( $\geq 1500$ bp) | 2253         | 10170        | 7458         | 2313          | 1332          | 7451         | 3757         | 3971         |
| # predicted genes ( $\geq 3000$ bp) | 109          | 533          | 508          | 133           | 95            | 396          | 189          | 324          |

28 **Table S4. Hun-encoding genes in *Atribacteria* MAG B2 with percent identity to homologous genes in other MAGs.** Hun genes were also  
 29 present in other MAGs from Site 1244 including *Planctomycetes* C1H3-B36 (contigs 839, 2603, and 27309) and *Firmicutes* E5B5-B3 (contigs 32  
 30 and 225).  
 31

| Gene        | Contig      | Gene       | <i>Actinobacteria</i><br>RBG_13_35_12 | <i>Atribacteria</i><br>JGI 0000014-F07 | <i>Atribacteria</i><br>CG2_30_33_13 | <i>Omnitrophica</i><br>WOR_2 SM23_29 | <i>Omnitrophica</i><br>RBG_13_46_9 | <i>Omnitrophica</i><br>RIFCSPHIGHO2_<br>02_FULL_45_28 |
|-------------|-------------|------------|---------------------------------------|----------------------------------------|-------------------------------------|--------------------------------------|------------------------------------|-------------------------------------------------------|
| <i>hunR</i> | E10H5 C341  | RXG63122.1 | OFW53501.1 (92%)                      | WP 090598640.1 (89%)                   | N/A                                 | N/A                                  | N/A                                | N/A                                                   |
| <i>hunA</i> | E10H5 C341  | RXG63123.1 | OFW53497.1 (91%)                      | WP 090598643.1 (89%)                   | OIP66900.1 (85%)                    | KPK38155.1 (68%)                     | OGW74721.1 (62%)                   | OGW81410.1 (63%)                                      |
| <i>hunB</i> | E10H5 C341  | RXG63124.1 | OFW53500.1 (91%)                      | WP 090598656.1 (93%)                   | OIP66908.1 (89%)                    | KPK38154.1 (77%)                     | OGW74722.1 (72%)                   | OGW81411.1 (69%)                                      |
| <i>hunC</i> | E10H5 C341  | RXG63125.1 | OFW53499.1 (95%)                      | WP 090598644.1 (94%)                   | OIP66907.1 (91%)                    | KPK38158.1 (80%)                     | OGW74723.1 (78%)                   | OGW81412.1 (68%)                                      |
| <i>hunD</i> | E10H5 C341  | RXG63126.1 | OFW53496.1 (93%)                      | WP 090598646.1 (95%)                   | OIP66899.1 (92%)                    | KPK38153.1 (81%)                     | OGW74724.1 (79%)                   | OGW81413.1 (70%)                                      |
| <i>hunE</i> | E10H5 C341  | RXG63127.1 | OFW53495.1 (96%)                      | WP 090598648.1 (95%)                   | OIP66906.1 (95%)                    | KPK39520.1 (90%)                     | OGW74725.1 (89%)                   | OGW81414.1 (85%)                                      |
| <i>hunF</i> | E10H5 C341  | RXG63128.1 | OFW53494.1 (85%)                      | WP 090598650.1 (83%)                   | OIP66898.1 (87%)                    | KPK39524.1 (73%)                     | OGW74727.1 (73%)                   | OGW81415.1 (68%)                                      |
| <i>hunG</i> | E10H5 C341  | RXG63129.1 | OFW53493.1 (97%)                      | WP 090598653.1 (94%)                   | OIP66897.1 (94%)                    | KPK39519.1 (85%)                     | OGW74726.1 (87%)                   | OGW81416.1 (78%)                                      |
| <i>hunH</i> | E10H5 C341  | RXG63130.1 | OFW53492.1 (88%)                      | WP 090599466.1 (88%)                   | OIP66896.1 (89%)                    | N/A                                  | N/A                                | OGW81417.1 (77%)                                      |
| <i>hunI</i> | E10H5 C1989 | RXG66691.1 | OFW53491.1 (89%)                      | WP 090599464.1 (89%)                   | OIP66895.1 (80%)                    | KPK39517.1 (83%)                     | OGW74728.1 (81%)                   | OGW81418.1 (72%)                                      |
| <i>hunJ</i> | E10H5 C1989 | RXG66692.1 | OFW53490.1 (95%)                      | WP 090599461.1 (85%)                   | OIP66894.1 (88%)                    | KPK40785.1 (85%)                     | OGW74729.1 (84%)                   | OGW81419.1 (80%)                                      |
| <i>hunK</i> | E10H5 C1989 | RXG66693.1 | OFW53489.1 (91%)                      | WP 090599460.1 (90%)                   | OIP66893.1 (90%)                    | KPK40786.1 (80%)                     | N/A                                | OGW81420.1 (76%)                                      |
| <i>hunL</i> | E10H5 C1989 | RXG66694.1 | OFW53498.1 (87%)                      | WP 090599470.1 (82%)                   | OIP66892.1 (86%)                    | N/A                                  | OGW74730.1 (76%)                   | OGW81421.1 (74%)                                      |
| <i>hunM</i> | E10H5 C1989 | RXG66695.1 | OFW53488.1 (87%)                      | WP 090599458.1 (86%)                   | OIP66891.1 (86%)                    | KPK40787.1 (73%)                     | OGW74758.1 (73%)                   | OGW81422.1 (65%)                                      |
| <i>hunN</i> | E10H5 C1989 | RXG66696.1 | N/A                                   | WP 090599455.1 (95%)                   | OIP66905.1 (91%)                    | KPK40788.1 (85%)                     | OGW74759.1 (85%)                   | OGW81430.1 (70%)                                      |
| <i>hunO</i> | E10H5 C5669 | RXG63005.1 | OFW53487.1 (91%)                      | WP 090599453.1 (88%)                   | OIP66890.1 (91%)                    | KPK40789.1 (77%)                     | OGW74731.1 (74%)                   | OGW81423.1 (70%)                                      |
| <i>hunP</i> | E10H5 C5669 | RXG63006.1 | N/A                                   | WP 090599451.1 (91%)                   | OIP66889.1 (88%)                    | KPK40790.1 (81%)                     | OGW74732.1 (76%)                   | OGW81424.1 (75%)                                      |

32  
 33

34 **Table S5. Acyl carrier protein (*acpP*) genes in E10-H5-B2 *Atribacteria* genomic bin with percent identity to *acpP* genes in five other**  
 35 ***Atribacteria* genomes (*Atribacteria* 34\_128, 4572\_76, HGW-1, RBG\_19FT\_COMBO\_35\_14, and CG2\_30\_33\_13).**  
 36 \*indicates a partial gene sequence.  
 37

| Contig                   | Gene       | Amino acids | 34_128            | 4572_76           | HGW-1             | RBG_19FT_COMBO_35_14 | CG2_30_33_13      |
|--------------------------|------------|-------------|-------------------|-------------------|-------------------|----------------------|-------------------|
| <b>Accession number:</b> |            |             | <b>KUK56008.1</b> | <b>OQY41085.1</b> | <b>PKP59192.1</b> | <b>OGD14223.1</b>    | <b>OIP70495.1</b> |
| E10H5_C2                 | RXG66890.1 | 74          | 74                | 72                | 73                | 73                   | 69                |
| E10H5_C194               | RXG65326.1 | 74          | 81                | 80                | 81                | 81                   | 74                |
| E10H5_C207               | RXG66930.1 | 74          | 78                | 76                | 78                | 77                   | 73                |
| E10H5_C233               | RXG62688.1 | 71          | 83                | 82                | 82                | 82                   | 79                |
| E10H5_C307               | RXG65598.1 | 82          | 85                | 80                | 81                | 80                   | 76                |
| E10H5_C434               | RXG65685.1 | 74          | 81                | 80                | 81                | 81                   | 74                |
| E10H5_C481               | RXG65420.1 | 74          | 89                | 84                | 85                | 84                   | 80                |
| E10H5_C779               | RXG65278.1 | 74          | 91                | 85                | 86                | 85                   | 80                |
| E10H5_C907               | RXG66987.1 | 74          | 80                | 77                | 78                | 77                   | 76                |
| E10H5_C1000              | RXG65256.1 | 74          | 86                | 82                | 82                | 82                   | 77                |
| E10H5_C2175              | RXG64430.1 | 64*         | 77                | 74                | 81                | 84                   | 81                |
| E10H5_C2325              | RXG64010.1 | 74          | 81                | 78                | 81                | 80                   | 76                |
| E10H5_C3768              | RXG63887.1 | 74          | 80                | 80                | 78                | 78                   | 73                |
| E10H5_C4452              | RXG64281.1 | 74          | 80                | 78                | 76                | 73                   | 72                |
| E10H5_C5892              | RXG66594.1 | 74          | 93                | 91                | 89                | 84                   | 81                |
| E10H5_C6352              | RXG66200.1 | 74          | 76                | 73                | 74                | 73                   | 68                |
| E10H5_C1912              | RXG63329.1 | 54*         | 87                | 85                | 85                | 83                   | 83                |

38 **Table S6. Microcompartment genes in E10-H5-B2 *Atribacteria* genomic bin.**

| Gene product      | Contig | Gene       | Top hit (% identity) | Top hit                   |
|-------------------|--------|------------|----------------------|---------------------------|
| D-sugar isomerase | E10H5_ | RXG65472.1 | PKP61549.1 (94%)     | <i>Atribacteria</i> HGW-1 |
| EutM              | C2169  | RXG65473.1 | PKP61548.1 (90%)     |                           |
| EutN              |        | RXG65474.1 | PKP61539.1 (97%)     |                           |
| EutN              |        | RXG65475.1 | PKP61537.1 (88%)     |                           |
| RnfC              |        | RXG65476.1 | PKP55925.1 (93%)     |                           |
| PduT              |        | RXG65477.1 | PKP55924.1 (93%)     |                           |
| EutE              | E10H5_ | RXG62592.1 | OGD15515.1 (98%)     |                           |
| EutN              | C5048  | RXG62591.1 | OGD15517.1 (94%)     |                           |
| EutN              |        | RXG62590.1 | OGD15517.1 (94%)     |                           |
| RpiB              |        | RXG62589.1 | OGD15527.1 (94%)     |                           |

39  
40

**Table S7. Glycosyltransferase contigs in E10-H5-B2 *Atribacteria* genomic bin, and percent identity to homologous genes in other genomes.**

| Annotation                                                | Contig      | Gene          | Top hit (% identity) | Top hit                                                  |
|-----------------------------------------------------------|-------------|---------------|----------------------|----------------------------------------------------------|
| Glycosyltransferase 2                                     | E10H5_C38   | N/A           | OFW63513.1 (72%)     | <i>Actinobacteria</i> RBG_19FT_COMBO_36_27               |
| Glycosyltransferase 1                                     |             | RXG64781.1    | OFW63514.1 (72%)     | <i>Actinobacteria</i> RBG_19FT_COMBO_36_27               |
| Glycosyltransferase 2                                     |             | RXG64782.1    | OGD31966.1 (66%)     | <i>Atribacteria</i> RBG_16_35_8                          |
| Glycosyltransferase 2                                     |             | RXG64783.1    | WP_104083790.1 (34%) | <i>Cryobacterium</i> Y11                                 |
| Glycosyltransferase 2                                     |             | RXG64791.1    | GBC98638.1 (43%)     | <i>Bacterium</i> HR17                                    |
| NAD-dependent epimerase/dehydratase                       |             | RXG64792.1    | OFW55242.1 (82%)     | <i>Actinobacteria</i> RBG_13_35_12                       |
| NDP-sugar synthase                                        |             | RXG64793.1    | OFW55241.1 (82%)     | <i>Actinobacteria</i> RBG_13_35_12                       |
| GDP-mannose 4,6-dehydratase                               |             | RXG64794.1    | OFW55240.1 (88%)     | <i>Actinobacteria</i> RBG_13_35_12                       |
| Glycosyltransferase 1                                     |             | E10H5_C81     | RXG64335.1           | WP_093394743.1 (45%)                                     |
| Glycosyltransferase 1                                     | RXG64336.1  |               | WP_093394743.1 (53%) | <i>Thermodesulforhabdus norvegica</i>                    |
| Glycosyltransferase 1                                     | RXG64337.1  |               | OGI06781.1 (40%)     | <i>Melainabacteria</i> RIFCSPLOWO2_12_FULL_35_11         |
| Glycosyltransferase 1                                     | RXG64338.1  |               | SPE32180.1 (46%)     | <i>Solibacteres</i> SbA2                                 |
| O-antigen ligase                                          | RXG64339.1  |               | OGD19921.1 (30%)     | <i>Aminicenantes</i> RBG_13_64_14                        |
| Glycosyltransferase 1                                     | RXG64340.1  |               | OGD19922.1 (55%)     | <i>Aminicenantes</i> RBG_13_64_14                        |
| Polysaccharide (de)acetylase                              | E10H5_C230  | RXG63410.1    | WP_019599125.1 (28%) | <i>Rhodonellum</i> spp.                                  |
| Exopolysaccharide polyprenyl glycosylphosphotransferase   |             | RXG63411.1    | PKP61696.1 (88%)     | <i>Atribacteria</i> HGW-1                                |
| Sugar epimerase                                           |             | RXG63412.1    | PKP61697.1 (77%)     | <i>Atribacteria</i> HGW-1                                |
| Glycosyltransferase 1 (Cap1E-like)                        |             | RXG63413.1    | WP_071120025.1 (57%) | <i>Romboutsia timonensis</i>                             |
| UDP-N-acetylglucosamine 4-epimerase                       |             | RXG63414.1    | WP_036938033.1 (71%) | <i>Pseudobacteroides cellulosolvans</i>                  |
| Vi polysaccharide biosynthesis protein                    |             | RXG63415.1    | WP_071120026.1 (68%) | <i>Romboutsia timonensis</i>                             |
| Phospholipid carrier-dependent glycosyltransferase        |             | RXG63416.1    | WP_036935155.1 (48%) | <i>Pseudobacteroides cellulosolvans</i>                  |
| Glycosyltransferase                                       |             | RXG63417.1    | PJE73714.1 (51%)     | <i>Terrybacteria</i> CG10_big_fil_rev_8_21_14_0_10_41_10 |
| Phospholipid carrier-dependent glycosyltransferase        |             | RXG63418.1    | WP_036935155.1 (43%) | <i>Pseudobacteroides cellulosolvans</i>                  |
| Glycosyltransferase 1                                     | E10H5_C3323 | RXG63206.1    | PKP61698.1 (81%)     | <i>Atribacteria</i> HGW-1                                |
| GDP-fucose synthetase                                     |             | RXG63207.1    | PKP61699.1 (85%)     | <i>Atribacteria</i> HGW-1                                |
| GDP-mannose 4,6-dehydratase                               |             | (2,613-2,990) | PKP61700.1 (82%)     | <i>Atribacteria</i> HGW-1                                |
| UDP-glucose 6-dehydrogenase (Ugd)                         | E10H5_C266  | RXG63573.1    | PKP61722.1 (77%)     | <i>Atribacteria</i> HGW-1                                |
| NAD-dependent epimerase/dehydratase                       |             | RXG63566.1    | PKP59007.1 (93%)     | <i>Atribacteria</i> HGW-1                                |
| Aminotransferase                                          |             | RXG63567.1    | PKP59008.1 (93%)     | <i>Atribacteria</i> HGW-1                                |
| Formyltransferase (non-ribosomal peptide synthetase-like) |             | RXG63568.1    | PKP59009.1 (90%)     | <i>Atribacteria</i> HGW-1                                |
| Acetyltransferase                                         |             | RXG63569.1    | PKP59010.1 (87%)     | <i>Atribacteria</i> HGW-1                                |
| Deacetylase                                               |             | RXG63570.1    | RME50047.1 (61%)     | <i>Deltaproteobacteria</i> bacterium                     |
| 7-keto-8-aminopelargonate synthetase                      | E10H5_C306  | RXG65589.1    | OGD15025.1 (91%)     | <i>Atribacteria</i> RBG_19FT_COMBO_35_14                 |
| UDP-glucose 4-epimerase                                   |             | RXG65590.1    | OGD15024.1 (84%)     | <i>Atribacteria</i> RBG_19FT_COMBO_35_14                 |
| UDP-glucose 4-epimerase                                   | E10H5_C441  | RXG65590.1    | OGD15024.1 (87%)     | <i>Atribacteria</i> RBG_19FT_COMBO_35_14                 |
| Radical SAM P-methyltransferase                           | E10H5_C558  | RXG63508.1    | OGD16377.1 (81%)     | <i>Atribacteria</i> RBG_19FT_COMBO_35_14                 |
| Glycosyltransferase 1                                     | E10H5_C1163 | RXG62499.1    | WP_090599978.1 (92%) | <i>Atribacteria</i> JGI_0000014-F07                      |
| Glycosyltransferase 1 (Cap1E-like)                        | E10H5_C3994 | RXG63236.1    | WP_071605078.1 (53%) | <i>Anaeroarcus burkinensis</i>                           |
| Exopolysaccharide polyprenyl glycosylphosphotransferase   |             | RXG63237.1    | PKP62045.1 (76%)     | <i>Atribacteria</i> HGW-1                                |
| Acetyltransferase                                         |             | RXG63239.1    | PKP62044.1 (84%)     | <i>Atribacteria</i> HGW-1                                |
| Polysaccharide biosynthesis protein                       |             | RXG63238.1    | PKP62043.1 (87%)     | <i>Atribacteria</i> HGW-1                                |
| Glycosyltransferase 4                                     | E10H5_C4124 | RXG64087.1    | PKP55791.1 (95%)     | <i>Atribacteria</i> HGW-1                                |
| Cyclic nucleotide-binding domain-containing protein       |             | RXG64088.1    | PKP55792.1 (93%)     | <i>Atribacteria</i> HGW-1                                |
| NAD-dependent epimerase/dehydratase                       | E10H5_C4631 | RXG66927.1    | PKP58948.1 (97%)     | <i>Atribacteria</i> HGW-1                                |
| Glycosyltransferase 4                                     |             | RXG66928.1    | PKP58071.1 (83%)     | <i>Atribacteria</i> HGW-1                                |
| Bacillithiol biosynthesis deacetylase                     | E10H5_C4676 | RXG65226.1    | OGD13744.1 (93%)     | <i>Atribacteria</i> RBG_19FT_COMBO_35_14                 |
| Glycosyltransferase 2                                     |             | RXG65225.1    | OGW00676.1 (55%)     | <i>Nitrospinae</i> RIFCSPLOWO2_01_FULL_39_10             |



42 **Table S8. Genes encoded on contigs containing the HTH-XRE transcriptional regulator/antitoxin AtiR in E10-H5-B2 *Atribacteria* genomic**  
 43 **bin, as shown in Figure 5, and percent identity to homologous genes in other genomes. Bolded genes were expressed in the metaproteome.**  
 44 **\*truncated protein; \*\*contain conserved arginine residue for carboxylate transport.**  
 45

| Annotation                                | Gene                                                                    | Contig       | Gene              | Top hit (% identity)                     | Top hit                                            |
|-------------------------------------------|-------------------------------------------------------------------------|--------------|-------------------|------------------------------------------|----------------------------------------------------|
| HTH-XRE regulator                         | <i>atiR</i>                                                             | E10H5_C107   | RXG62479.1        | EGC82411.1 (49%)                         | <i>Anaerococcus prevotii</i>                       |
|                                           |                                                                         | E10H5_C473   | RXG64192.1        | EGC82411.1 (48%)                         | <i>Anaerococcus prevotii</i>                       |
|                                           |                                                                         | E10H5_C194   | RXG65323.1        | EGC82411.1 (44%)                         | <i>Anaerococcus prevotii</i>                       |
|                                           |                                                                         | E10H5_C1742  | RXG64293.1        | EGC82411.1 (41%)                         | <i>Anaerococcus prevotii</i>                       |
|                                           |                                                                         | E10H5_C95    | RXG62928.1*       | EGC82411.1 (44%)                         | <i>Anaerococcus prevotii</i>                       |
|                                           |                                                                         | E10H5_C238   | RXG62729.1        | EGC82411.1 (46%)                         | <i>Anaerococcus prevotii</i>                       |
|                                           |                                                                         | E10H5_C2     | RXG66887.1        | EGC82411.1 (47%)                         | <i>Anaerococcus prevotii</i>                       |
|                                           |                                                                         | E10H5_C486   | RXG66788.1        | EGC82411.1 (43%)                         | <i>Anaerococcus prevotii</i>                       |
|                                           |                                                                         | E10H5_C687   | RXG66393.1        | EGC82411.1 (46%)                         | <i>Anaerococcus prevotii</i>                       |
|                                           |                                                                         | E10H5_C103   | RXG62795.1        | WP_053481761.1 (39%)                     | <i>Lysinibacillus</i> FJAT-14745                   |
|                                           |                                                                         | E10H5_C85    | RXG66363.1        | WP_053481761.1 (43%)                     | <i>Lysinibacillus</i> FJAT-14745                   |
|                                           |                                                                         | E10H5_C4712  | RXG63519.1        | EGC82411.1 (46%)                         | <i>Anaerococcus prevotii</i>                       |
|                                           |                                                                         | E10H5_C1316  | RXG65641.1        | WP_067697725.1 (43%)                     | <i>Nocardia jejuensis</i>                          |
|                                           |                                                                         | E10H5_C5280  | RXG63000.1        | WP_067697725.1 (47%)                     | <i>Nocardia jejuensis</i>                          |
|                                           |                                                                         | E10H5_C2922  | RXG65842.1        | EGC82411.1 (48%)                         | <i>Anaerococcus prevotii</i>                       |
| Tripartite tricarboxylate transporter     | <i>tctC</i><br><i>tctB</i><br><i>tctA</i>                               | E10H5_C95    | RXG62929.1        | WP_066240574.1 (53%)                     | <i>Anaerospromusa subterranea</i>                  |
|                                           |                                                                         |              | RXG62930.1        | WP_118245178.1 (35%)                     | <i>Clostridium</i> AM58-1XD                        |
|                                           |                                                                         |              | RXG62931.1        | WP_093692001.1 (54%)                     | <i>Sporolituus thermophilus</i>                    |
|                                           | <i>tctC</i><br><i>tctB</i><br><i>tctA</i>                               | E10H5_C107   | RXG62483.1        | WP_052514908.1 (51%)                     | <i>Dethiosulfatarculus sandiegensis</i>            |
|                                           |                                                                         |              | RXG62484.1        | WP_044347447.1 (39%)                     | <i>Dethiosulfatarculus sandiegensis</i>            |
|                                           |                                                                         |              | RXG62485.1        | WP_044347445.1 (56%)                     | <i>Dethiosulfatarculus sandiegensis</i>            |
| C4-dicarboxylate transporter              | <i>dctP</i><br><i>dctQ</i><br><i>dctM</i>                               | E10H5_C95    | RXG62935.1**      | PKL21426.1 (55%)                         | <i>Spirochaetae</i> HGW-1                          |
|                                           |                                                                         |              | <b>RXG62936.1</b> | <b>AEG13811.1 (34%)</b>                  | <b><i>Desulfofundulus kuznetsovii</i> DSM 6115</b> |
|                                           |                                                                         |              | RXG62937.1        | PKL21182.1 (57%)                         | <i>Spirochaetae</i> HGW-4                          |
|                                           |                                                                         |              |                   |                                          |                                                    |
|                                           | <i>dctP</i><br><i>dctQ</i><br><i>dctM</i>                               | E10H5_C238   | RXG62728.1        | PIX34871.1 (81%)                         | <i>Atribacteria</i> CG_4_8_14_3_um_filter_34_18    |
|                                           |                                                                         |              | RXG62727.1        | PIX34872.1 (77%)                         | <i>Atribacteria</i> CG_4_8_14_3_um_filter_34_18    |
|                                           |                                                                         |              | RXG62726.1        | PIX34873.1 (75%)                         | <i>Atribacteria</i> CG_4_8_14_3_um_filter_34_18    |
|                                           |                                                                         |              |                   |                                          |                                                    |
| <i>dctP</i><br><i>dctQ</i><br><i>dctM</i> | E10H5_C486                                                              | RXG66786.1** | RLC38797.1 (85%)  | <i>Nealsonbacteria</i> bacterium         |                                                    |
|                                           |                                                                         | RXG66785.1   | OGD14926.1 (73%)  | <i>Atribacteria</i> RBG_19FT_COMBO_35_14 |                                                    |
|                                           |                                                                         | RXG66784.1   | OGD14925.1 (82%)  | <i>Atribacteria</i> RBG_19FT_COMBO_35_14 |                                                    |
|                                           |                                                                         |              |                   |                                          |                                                    |
|                                           | <i>dctP</i><br><i>dctQ</i><br><i>dctM</i>                               | E10H5_C664   | RXG63168.1        | WP_044348842.1 (36%)                     | <i>Dethiosulfatarculus sandiegensis</i>            |
|                                           |                                                                         |              | RXG63170.1        | WP_052515103.1 (32%)                     | <i>Dethiosulfatarculus sandiegensis</i>            |
|                                           |                                                                         |              | RXG63171.1        | WP_044348841.1 (57%)                     | <i>Dethiosulfatarculus sandiegensis</i>            |
|                                           |                                                                         |              |                   |                                          |                                                    |
| Glycerol-3-phosphate transporter          | <i>ugpB</i><br><i>ugpA</i><br><i>ugpE</i>                               | E10H5_C85    | RXG66368.1        | KPJ85459.1 (68%)                         | <i>Spirochaetes</i> DG_61                          |
|                                           |                                                                         |              | RXG66369.1        | KPJ85458.1 (67%)                         | <i>Spirochaetes</i> DG_61                          |
|                                           |                                                                         |              | RXG66370.1        | KPJ85457.1 (71%)                         | <i>Spirochaetes</i> DG_61                          |
|                                           | <i>ugpB</i><br><i>ugpA</i><br><i>ugpE</i>                               | E10H5_C103   | RXG62790.1        | WP_068137292.1 (47%)                     | <i>Limnochorda pilosa</i>                          |
|                                           |                                                                         |              | RXG62789.1        | WP_082726097.1 (46%)                     | <i>Limnochorda pilosa</i>                          |
|                                           |                                                                         |              | RXG62788.1        | WP_068137283.1 (46%)                     | <i>Limnochorda pilosa</i>                          |
| Branched chain amino acid transporters    | <i>livH</i><br><i>livM</i><br><i>livG</i><br><i>livF</i><br><i>livK</i> | E10H5_C2     | RXG66901.1        | PKP61938.1 (90%)                         | <i>Atribacteria</i> HGW-1                          |
|                                           |                                                                         |              | RXG66900.1        | PKP61939.1 (85%)                         | <i>Atribacteria</i> HGW-1                          |
|                                           |                                                                         |              | RXG66899.1        | PKP61948.1 (85%)                         | <i>Atribacteria</i> HGW-1                          |
|                                           |                                                                         |              | RXG66898.1        | PKP61940.1 (80%)                         | <i>Atribacteria</i> HGW-1                          |
|                                           |                                                                         |              | RXG66897.1        | PKP61941.1 (89%)                         | <i>Atribacteria</i> HGW-1                          |

|                    |                                                                         |                                                                                                    |                                                                                                |                                                                                                                                                          |                                                                                                                                                                                                                              |
|--------------------|-------------------------------------------------------------------------|----------------------------------------------------------------------------------------------------|------------------------------------------------------------------------------------------------|----------------------------------------------------------------------------------------------------------------------------------------------------------|------------------------------------------------------------------------------------------------------------------------------------------------------------------------------------------------------------------------------|
|                    | <i>livK</i><br><i>livH</i><br><i>livM</i><br><i>livG</i><br><i>livF</i> | E10H5_C238                                                                                         | RXG62734.1<br>RXG62732.1<br>RXG62736.1<br>RXG62731.1<br>RXG62730.1                             | WP_068748291.1 (42%)<br>RLE68614.1 (60%)<br>RLE68615.1 (55%)<br>RLE68616.1 (57%)<br>RLE68617.1 (56%)                                                     | <i>Thermovenabulum gondwanense</i><br><i>Thermoprotei</i> archaeon<br><i>Thermoprotei</i> archaeon<br><i>Thermoprotei</i> archaeon<br><i>Thermoprotei</i> archaeon                                                           |
|                    | <i>livK</i><br><i>livH</i><br><i>livM</i><br><i>livG</i><br><i>livF</i> | E10H5_C687                                                                                         | RXG66394.1<br>RXG66395.1<br>RXG66396.1<br>RXG66397.1<br>RXG66398.1                             | OQY40502.1 (43%)<br>OQY40503.1 (41%)<br>OQY40504.1 (42%)<br>OGP70799.1 (50%)<br>OQY40505.1 (55%)                                                         | <i>Atribacteria</i> 4572_76<br><i>Atribacteria</i> 4572_76<br><i>Atribacteria</i> 4572_76<br><i>Deltaproteobacteria</i> RBG_16_50_11<br><i>Atribacteria</i> 4572_76                                                          |
|                    | <i>livH</i><br><i>livM</i>                                              | <b>E10H5_C8009</b>                                                                                 | <b>30420</b><br>30421                                                                          | <b>OQY40503.1 (95%)</b><br>OQY40504.1 (93%)                                                                                                              | <i>Atribacteria</i> 4572_76<br><i>Atribacteria</i> 4572_76                                                                                                                                                                   |
| Purine transporter | <i>bmpA</i>                                                             | <b>E10H5_C473</b>                                                                                  | RXG64193.1<br>RXG64197.1<br>RXG64194.1<br>RXG64195.1                                           | <b>PKP58720.1 (94%)</b><br>PKP60518.1 (88%)<br>PKP60517.1 (94%)<br>PKP60516.1 (96%)                                                                      | <i>Atribacteria</i> HGW-1<br><i>Atribacteria</i> HGW-1<br><i>Atribacteria</i> HGW-1<br><i>Atribacteria</i> HGW-1                                                                                                             |
| Other genes        | M20<br><br><i>gabT</i><br>C69<br>RTX<br>RTX                             | E10H5_C194<br>E10H5_C194<br>E10H5_C194<br>E10H5_C4712<br>E10H5_C2795<br>E10H5_C1316<br>E10H5_C2922 | RXG65322.1<br>RXG65321.1<br>RXG65329.1<br>RXG63518.1<br>RXG64595.1<br>RXG65639.1<br>RXG65844.1 | WP_034420537.1 (72%)<br>WP_034420536.1 (73%)<br>WP_034420535.1 (75%)<br>PKP55816.1 (87%)<br>WP_093794159.1 (43%)<br>OGD35967.1 (42%)<br>OGD35967.1 (43%) | <i>Clostridiales</i> DRI-13<br><i>Clostridiales</i> DRI-13<br><i>Clostridiales</i> DRI-13<br><i>Atribacteria</i> HGW-1<br><i>Sporomusa acidovorans</i><br><i>Atribacteria</i> RBG_16_35_8<br><i>Atribacteria</i> RBG_16_35_8 |

47 **Table S9. Putative toxin-antitoxin systems in *Atribacteria* E10H5-B2, and percent identity to homologous genes in other genomes.**

| Annotation         | Gene                   | Contig      | Gene       | Top hit (% identity) | Top hit                                           |
|--------------------|------------------------|-------------|------------|----------------------|---------------------------------------------------|
| Antitoxin<br>Toxin | MazE-like<br>MazF-like | E10H5_C26   | RXG62841.1 | PIU28774.1 (82%)     | <i>Actinobacteria</i> CG08_land_8_20_14_0_20_35_9 |
|                    |                        |             | RXG62840.1 | PIU28775.1 (88%)     | <i>Actinobacteria</i> CG08_land_8_20_14_0_20_35_9 |
| Antitoxin<br>Toxin | NikR-like<br>MazF-like | E10H5_C33   | RXG63986.1 | PIU25819.1 (95%)     | <i>Atribacteria</i> CG08_land_8_20_14_0_20_33_29  |
|                    |                        |             | RXG63985.1 | PIU25820.1 (83%)     | <i>Atribacteria</i> CG08_land_8_20_14_0_20_33_29  |
| Antitoxin<br>Toxin | MazE-like<br>MazF-like | E10H5_C68   | RXG64905.1 | PKP54844.1 (89%)     | <i>Atribacteria</i> HGW-1                         |
|                    |                        |             | RXG64906.1 | PKP54843.1 (84%)     | <i>Atribacteria</i> HGW-1                         |
| Antitoxin<br>Toxin | VapC-like<br>MazE-like | E10H5_C81   | RXG64104.1 | PKP54729.1 (90%)     | <i>Atribacteria</i> HGW-1                         |
|                    |                        |             | RXG64105.1 | PKP54728.1 (81%)     | <i>Atribacteria</i> HGW-1                         |
| Antitoxin<br>Toxin | MazE-like<br>MazF-like | E10H5_C81   | RXG64330.1 | PIY33044.1 (92%)     | <i>Atribacteria</i> CG_4_10_14_3_um_filter_34_13  |
|                    |                        |             | RXG64331.1 | PIY33045.1 (92%)     | <i>Atribacteria</i> CG_4_10_14_3_um_filter_34_13  |
| Antitoxin<br>Toxin | MazE-like<br>MazF-like | E10H5_C184  | RXG64099.1 | OQY39409.1 (97%)     | <i>Atribacteria</i> 4572_76                       |
|                    |                        |             | RXG64098.1 | OQY39408.1 (98%)     | <i>Atribacteria</i> 4572_76                       |
| Antitoxin<br>Toxin | MazE-like<br>MazF-like | E10H5_C1146 | RXG64860.1 | WP_090599534.1 (91%) | <i>Atribacteria</i> JGI 0000014-F07               |
|                    |                        |             | RXG64859.1 | WP_090599536.1 (89%) | <i>Atribacteria</i> JGI 0000014-F07               |
| Antitoxin<br>Toxin | MazE-like<br>MazF-like | E10H5_C1351 | RXG65145.1 | PKP54770.1 (94%)     | <i>Atribacteria</i> HGW-1                         |
|                    |                        |             | RXG65146.1 | PKP54769.1 (89%)     | <i>Atribacteria</i> HGW-1                         |
| Antitoxin<br>Toxin | MazE-like<br>MazF-like | E10H5_C5010 | RXG67035.1 | WP_078128337.1 (59%) | <i>Leptospira alexanderi</i>                      |
|                    |                        |             | RXG67036.1 | WP_010577027.1 (74%) | <i>Leptospira alexanderi</i>                      |

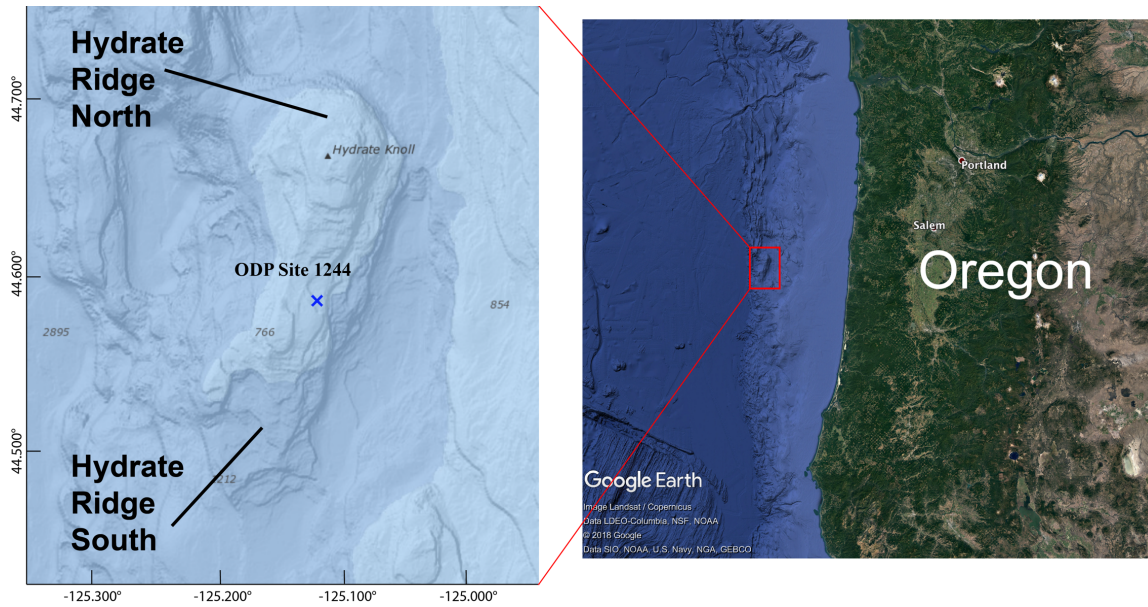

48

49 **Figure S1.** Map of Site ODP 1244 (44°35.1784'N; 125°7.1902'W) on Hydrate Ridge, drilled on IODP Leg 204. The site is located 80 km west of  
 50 Oregon, in the accretionary complex of the Cascadia subduction zone, on the eastern flank of Hydrate Ridge, ~3 km northeast of the southern summit.

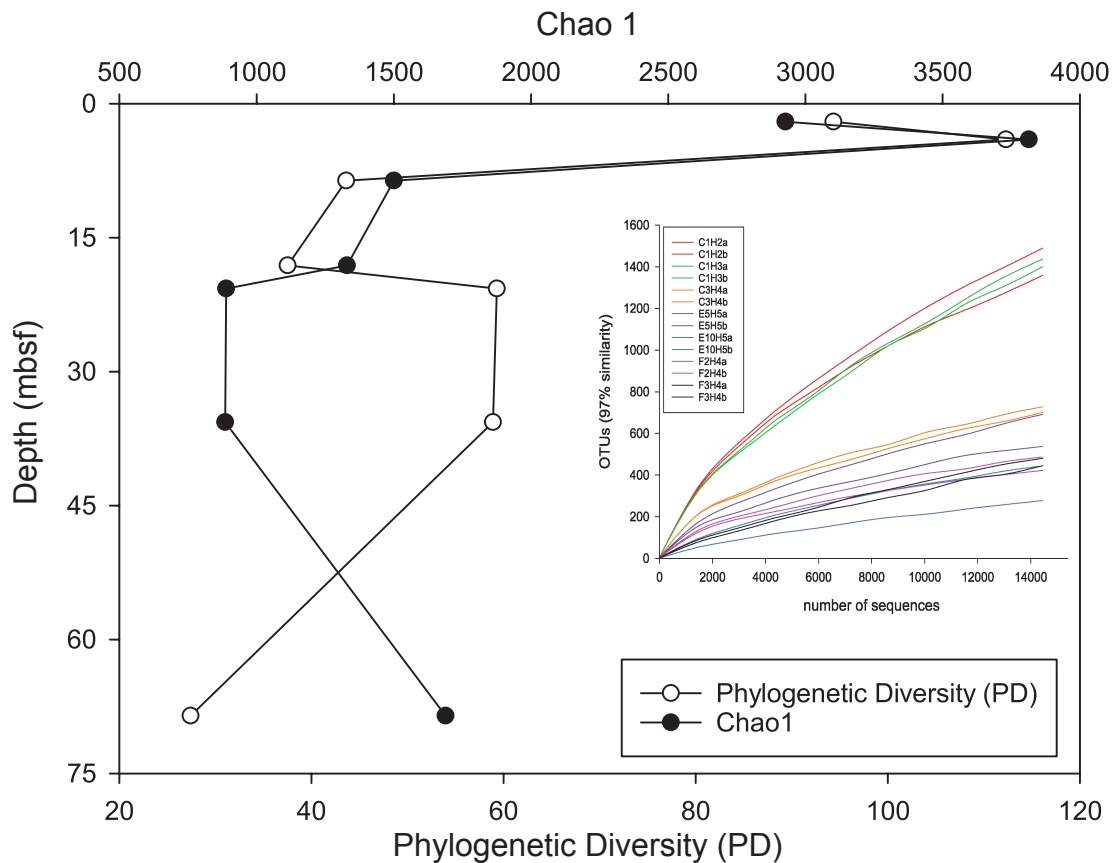

52

53 **Figure S2.** Chao1 and phylogenetic diversity (PD) as a function of sediment depth. Data points are  
 54 mean values based on rarefaction at a standardized sequence count ( $n=14,390$ ) per sample. The  
 55 inset shows the number of observed OTUs (97% similarity clusters) as a function of sequencing  
 56 depth based on rarefaction of OTU counts for replicate samples.

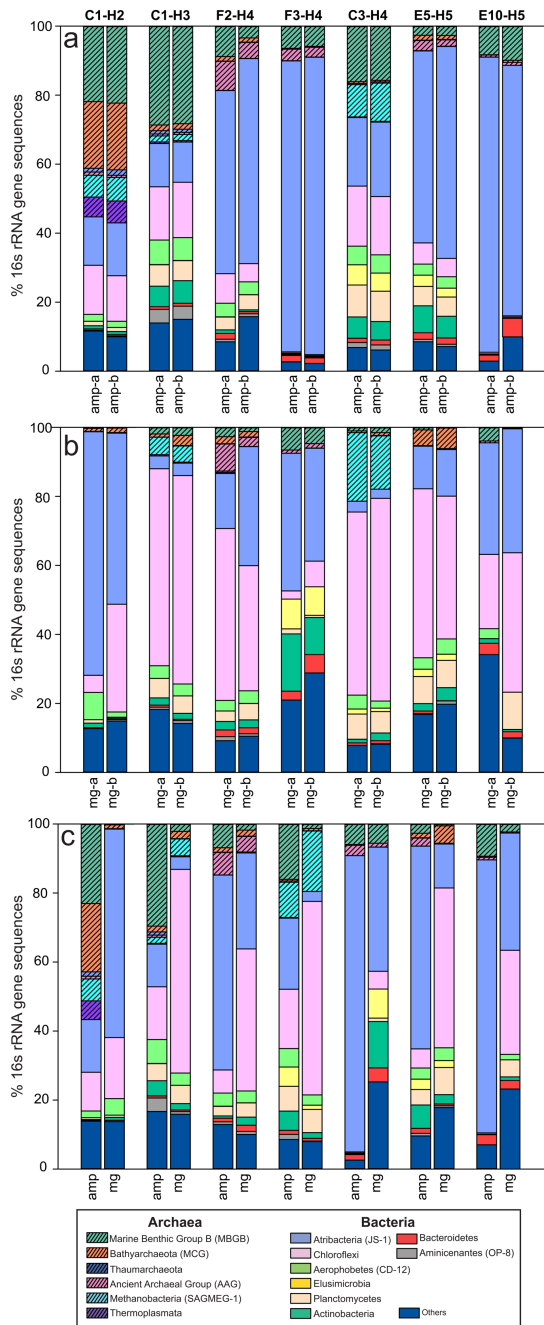

57

58 **Figure S3.** Comparison of the 16S rRNA gene amplicon sequencing vs. 16S rRNA metagenomic

59 sequences, and replicates of each for: (a) amplicon sequence (technical replicates “a” and “b”), (b)

60 metagenomic sequences (technical replicates “a” and “b”), and (c) average amplicon (“amp”, left

61 bar) and metagenome (“mg”, right bar). Hatched and solid bars are archaeal and bacterial clades,

62 respectively. The “others” category contains phyla with a total abundance of <2% for any given

63 sample.

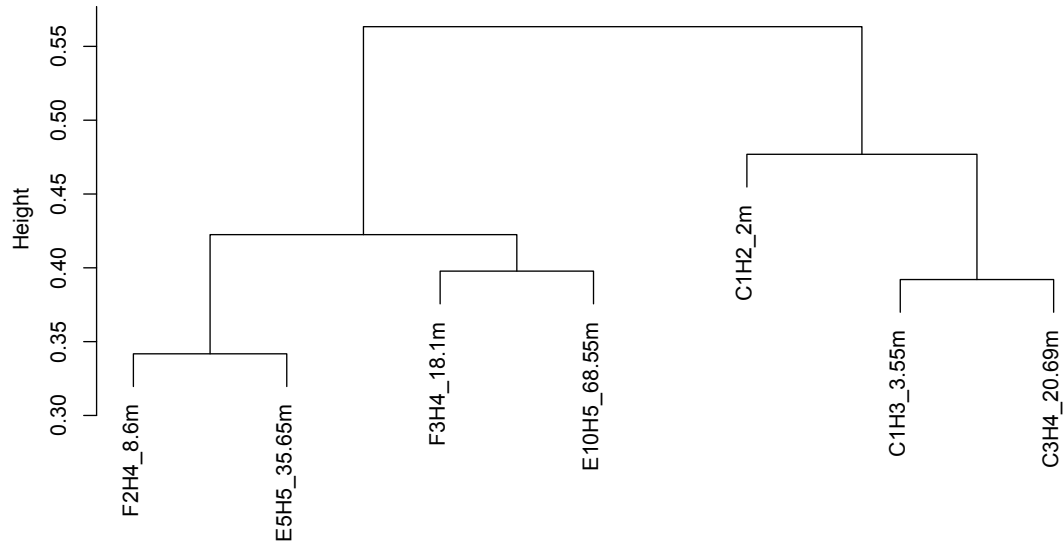

64

65 **Figure S4.** Hierarchical clustering dendrogram showing sample groupings for Atribacteria  
 66 communities at different depths. OTU abundances were log transformed and OTUs with 0  
 67 abundance (absence) were ignored.
