# Supplementary material for: Microbial metabolism and adaptations in Atribacteria-dominated methane hydrate sediments
Source: bioRxiv or medRxiv preprint supplement (doi:10.1101/536078), 2021-06-14
Supplement: Supplementary file [file media-1.pdf]

1 **Supplemental Materials**

2 **Microbial metabolism and adaptations in *Atribacteria*-dominated methane hydrate sediments**

3 Jennifer B. Glass<sup>1\*</sup>, Piyush Ranjan<sup>2#</sup>, Cecilia B. Kretz<sup>§</sup>, Brook L. Nunn<sup>3</sup>, Abigail M. Johnson<sup>1</sup>, Manlin Xu<sup>1</sup>, James McManus<sup>4</sup>, Frank J. Stewart<sup>2,5</sup>

4

5 <sup>1</sup>School of Earth and Atmospheric Sciences, Georgia Institute of Technology, Atlanta, GA, USA; <sup>2</sup>School of Biological Sciences, Georgia Institute  
6 of Technology, Atlanta, GA, USA; <sup>3</sup>Department of Genome Sciences, University of Washington, Seattle, WA; <sup>4</sup>Bigelow Laboratory for Ocean  
7 Sciences, East Boothbay, ME, USA; <sup>5</sup>Department of Microbiology & Immunology, Montana State University, Bozeman, MT, USA

8

9 \*Corresponding Author: [jennifer.glass@eas.gatech.edu](mailto:jennifer.glass@eas.gatech.edu)

10

11 #Now at: Michigan Medicine, University of Michigan, Ann Arbor, Michigan, USA;

12 §Now at: Association of Public Health Laboratories, Manager of Emerging and Zoonotic Infectious Diseases, Silver Spring, MD, USA

13

14 **Running Title:** *Atribacteria* adaptations in methane hydrate ecosystem

15 **Dedication:** To Katrina Edwards

16 **Table S1.** Additional geochemical data for ODP Site 1244 at Hydrate Ridge drilled on IODP Leg 204. Note: data not available (ND) for sample  
 17 E5H5 (35.65 mbsf). SMTZ: sulfate-methane transition zone; MRZ: metal reduction zone; GHSZ: gas hydrate stability zone. DNA sequencing  
 18 from E19H5 was unsuccessful. TC: total carbon; TN: total nitrogen; TIC: total inorganic carbon; TOC: total organic carbon; C:N carbon:nitrogen.

19

| Hole  | Zone | Depth (mbsf) | %TC  | %TN  | %TS  | %TIC | %TOC | C:N   | %CaCO <sub>3</sub> | reactive<br>Fe (%) | reactive<br>Mn (%) |
|-------|------|--------------|------|------|------|------|------|-------|--------------------|--------------------|--------------------|
| C1H2  | SMTZ | 1.95/2.25    | 2.07 | 0.20 | 0.42 | 0.17 | 1.9  | 11.05 | 1.46               | 0.38               | 0.002              |
| C1H3  | SMTZ | 3.45/3.75    | 1.88 | 0.14 | 0.55 | 0.70 | 1.2  | 9.85  | 5.81               | 0.45               | 0.004              |
| F2H4  | SMTZ | 8.6          | 1.54 | 0.17 | 0.39 | 0.44 | 1.1  | 7.55  | 3.66               | 0.57               | 0.005              |
| F3H4  | MRZ  | 18.1         | 1.55 | 0.24 | 0.64 | 0.08 | 1.5  | 7.14  | 0.68               | 0.80               | 0.004              |
| C3H4  | MRZ  | 20.69        | 1.22 | 0.18 | 0.22 | 0.08 | 1.1  | 7.40  | 0.65               | 1.10               | 0.004              |
| E5H5  | MRZ  | 35.65        | NA   | NA   | NA   | NA   | NA   | NA    | NA                 | NA                 | NA                 |
| E10H5 | GHSZ | 68.55        | 1.71 | 0.22 | 0.42 | 0.13 | 1.6  | 8.38  | 1.08               | 0.51               | 0.003              |
| E19H5 | GHSZ | 138.89       | 1.42 | 0.20 | 0.07 | 0.51 | 0.9  | 5.32  | 4.23               | 1.41               | 0.012              |

20



24  
25

**Table S3. Quality evaluation and accession numbers of the 21 metagenome-assembled genomes from IODP Site 1244 generated in this study with >35% completeness and <10% contamination.**

| Assembly      | WGS          | BioSample    | MAG ID         | Taxon                             | Size (bp) | Contigs | CDS  | N50     | GC (%) | Completeness (%) | Contamination (%) | Heterogeneity (%) |
|---------------|--------------|--------------|----------------|-----------------------------------|-----------|---------|------|---------|--------|------------------|-------------------|-------------------|
| GCA_009619245 | WJOO00000000 | SAMN13181020 | 1244-C1-H3-B20 | Dehalococcoidia (Chloroflexi)     | 1,744,267 | 338     | 1772 | 6,049   | 52     | 75               | 9                 | 0                 |
| GCA_009619075 | WJOY00000000 | SAMN13181030 | 1244-C3-H4-B3  |                                   | 935,948   | 47      | 910  | 30,310  | 45     | 74               | 3                 | 67                |
| GCA_009619025 | WJPC00000000 | SAMN13181034 | 1244-E5-H5-B4  |                                   | 620,966   | 90      | 634  | 7,554   | 55     | 49               | 0                 | 0                 |
| GCA_009619235 | WJPE00000000 | SAMN13181036 | 1244-E5-H5-B9  |                                   | 1,315,519 | 215     | 1385 | 7,652   | 53     | 71               | 5                 | 75                |
| GCA_009619215 | WJPF00000000 | SAMN13181037 | 1244-E10-H5-B3 |                                   | 971,417   | 200     | 1038 | 6,335   | 56     | 72               | 5                 | 29                |
| GCA_009618505 | WJOQ00000000 | SAMN13181022 | 1244-F2-H4-B2  | Clostridia (Firmicutes)           | 2,136,034 | 406     | 2041 | 6,910   | 40     | 79               | 4                 | 50                |
| GCA_009619115 | WJOR00000000 | SAMN13181023 | 1244-F2-H4-B10 |                                   | 974,022   | 276     | 956  | 3,720   | 43     | 39               | 0                 | 0                 |
| GCA_009619015 | WJOU00000000 | SAMN13181026 | 1244-F3-H4-B2  |                                   | 2,140,048 | 47      | 2077 | 131,274 | 34     | 81               | 0                 | 0                 |
| GCA_009619095 | WJOT00000000 | SAMN13181025 | 1244-F3-H4-B3  |                                   | 1,988,642 | 132     | 1758 | 24,484  | 41     | 90               | 5                 | 33                |
| GCA_009618495 | WJPA00000000 | SAMN13181032 | 1244-C3-H4-B5  |                                   | 998,110   | 85      | 881  | 18,112  | 42     | 57               | 2                 | 0                 |
| GCA_003575245 | NMQN00000000 | SAMN07342547 | 1244-E10-H5-B2 | Atribacteria                      | 4,055,260 | 912     | 4254 | 5,515   | 33     | 69               | 2                 | 100               |
| GCA_009619225 | WJOX00000000 | SAMN13181029 | 1244-C3-H4-B19 | Bacteroidetes                     | 3,577,859 | 750     | 2889 | 6,011   | 38     | 77               | 6                 | 14                |
| GCA_009619295 | WJOP00000000 | SAMN13181021 | 1244-C1-H3-B22 | Calditrichaeota                   | 2,223,554 | 459     | 2191 | 6,605   | 57     | 81               | 10                | 27                |
| GCA_009619035 | WJPB00000000 | SAMN13181033 | 1244-E5-H5-B19 | Spirochaeta                       | 1,522,441 | 390     | 1452 | 4,221   | 47     | 41               | 0                 | 0                 |
| GCA_009619125 | WJON00000000 | SAMN13181019 | 1244-C1-H3-B19 | Unclassified bacterium            | 1,724,327 | 226     | 1686 | 9,503   | 53     | 61               | 2                 | 0                 |
| GCA_009619195 | WJOZ00000000 | SAMN13181031 | 1244-C3-H4-B23 |                                   | 1,437,950 | 349     | 1342 | 4,977   | 41     | 59               | 1                 | 0                 |
| GCA_009618485 | WJOM00000000 | SAMN13181018 | 1244-C1-H3-B37 |                                   | 1,464,732 | 418     | 1426 | 3,969   | 47     | 50               | 0                 | 0                 |
| GCA_009619155 | WJOW00000000 | SAMN13181028 | 1244-C3-H4-B1  | Hadesarchaea                      | 1,294,504 | 20      | 1460 | 148,197 | 50     | 88               | 4                 | 17                |
| GCA_009618475 | WJOV00000000 | SAMN13181027 | 1244-F3-H4-B6  | Methanosarcinales (Euryarchaeota) | 1,093,430 | 165     | 1299 | 8,522   | 43     | 60               | 2                 | 0                 |
| GCA_009619135 | WJPD00000000 | SAMN13181035 | 1244-E5-H5-B17 | Unclassified archaeon             | 1,307,191 | 249     | 1467 | 6,784   | 58     | 49               | 1                 | 0                 |
| GCA_009619335 | WJOS00000000 | SAMN13181024 | 1244-F2-H4-B13 |                                   | 825,629   | 212     | 930  | 4,508   | 42     | 39               | 1                 | 0                 |

26  
27

Table S4. Matrix of average amino acid identities for the JS-1 Genus-1 MAGs.

|                  | <b>35_14</b> | <b>HGW-1</b> | <b>E44_bin65</b> | <b>MT.SAG.1</b> | <b>UBA7920</b> | <b>E10H5-B2</b> | <b>4572_76</b> |
|------------------|--------------|--------------|------------------|-----------------|----------------|-----------------|----------------|
| <b>35_14</b>     |              |              |                  |                 |                |                 |                |
| <b>HGW-1</b>     | 78           |              |                  |                 |                |                 |                |
| <b>E44_bin65</b> | 78           | 74           |                  |                 |                |                 |                |
| <b>MT.SAG.1</b>  | 76           | 74           | 77               |                 |                |                 |                |
| <b>UBA7920</b>   | 81           | 79           | 79               | 78              |                |                 |                |
| <b>E10H5-B2</b>  | 77           | 73           | 81               | 76              | 78             |                 |                |
| <b>4572_76</b>   | 78           | 76           | 72               | 73              | 80             | 76              |                |
| <b>UBA9311</b>   | 79           | 79           | 77               | 75              | 83             | 80              | 83             |

28

29 **Table S5. Hun-encoding genes in *Atribacteria* MAG B2 with percent identity to top hits in other MAGs.** Hun genes were also present in other  
 30 MAGs from Site 1244 including *Firmicutes* E5B5-B3 (contigs 32 and 225).  
 31

| Gene        | PFAM                                                                        | B2 contig E10H5_ | B2 gene  | <i>Atribacteria</i> bacterium isolate UBA7920 | <i>Candidatus Atribacteria</i> bacterium MT.SAG.1 | <i>Actinobacteria</i> RBG_13_35_12 | <i>Atribacteria</i> JGI 0000014-F07 | <i>Atribacteria</i> CG2_30_33_13 | <i>Omnitrophica</i> WOR_2 SM23_29 | <i>Omnitrophica</i> RBG_13_46_9 | <i>Omnitrophica</i> RIFCSPHIGHO2 02_FULL_45_28 |
|-------------|-----------------------------------------------------------------------------|------------------|----------|-----------------------------------------------|---------------------------------------------------|------------------------------------|-------------------------------------|----------------------------------|-----------------------------------|---------------------------------|------------------------------------------------|
| <i>hunR</i> | PF02629 (CoA binding), PF06971 (Put DNA-bind N)                             | C341             | RXG63122 | N/A                                           | TFB08687 (88%)                                    | OFW53501 (92%)                     | WP_09059864 (89%)                   | N/A                              | N/A                               | N/A                             | N/A                                            |
| <i>hunA</i> | PF17179 (Fer4_22)                                                           | C341             | RXG63123 | HAJ31991 (87%)                                | TFB08688 (93%)                                    | OFW53497 (91%)                     | WP_090598643 (89%)                  | OIP6690 (85%)                    | KPK38155 (68%)                    | OGW74721 (62%)                  | OGW81410 (63%)                                 |
| <i>hunB</i> | PF00175 (NAD_binding_1), PF00970 (FAD_binding_6), PF10418 (DHODB_Fe-S_bind) | C341             | RXG63124 | HAJ31992 (94%)                                | TFB08716 (92%)                                    | OFW53500 (91%)                     | WP_090598656 (93%)                  | OIP66908 (89%)                   | KPK38154 (77%)                    | OGW74722 (72%)                  | OGW81411 (69%)                                 |
| <i>hunC</i> | PF13247 (Fer4_11)                                                           | C341             | RXG63125 | HAJ31993 (94%)                                | TFB08689 (93%)                                    | OFW53499 (95%)                     | WP_090598644 (94%)                  | OIP66907 (91%)                   | KPK38158 (80%)                    | OGW74723 (78%)                  | OGW81412 (68%)                                 |
| <i>hunD</i> | PF00146 (NADHdh)                                                            | C341             | RXG63126 | HAJ31994 (96%)                                | TFB08690 (95%)                                    | OFW53496 (93%)                     | WP_090598646 (95%)                  | OIP66899 (92%)                   | KPK38153 (81%)                    | OGW74724 (79%)                  | OGW81413 (70%)                                 |
| <i>hunE</i> | PF01058 (Oxidored_q6)                                                       | C341             | RXG63127 | HAJ31995 (98%)                                | TFB08691 (92%)                                    | OFW53495 (96%)                     | WP_090598648 (95%)                  | OIP66906 (95%)                   | KPK39520 (90%)                    | OGW74725 (89%)                  | OGW81414 (85%)                                 |
| <i>hunF</i> | PF00329 (Complex1_30kDa)                                                    | C341             | RXG63128 | HAJ31996 (87%)                                | TFB08692 (91%)                                    | OFW53494 (85%)                     | WP_090598650 (83%)                  | OIP66898 (87%)                   | KPK39524 (73%)                    | OGW74727 (73%)                  | OGW81415 (68%)                                 |
| <i>hunG</i> | PF00346 (Complex1_49kDa), PF00374 (NiFeSe_Hases)                            | C341             | RXG63129 | HAJ31997 (95%)                                | TFB08717 (96%)                                    | OFW53493 (97%)                     | WP_090598653 (94%)                  | OIP66897 (94%)                   | KPK39519 (85%)                    | OGW74726 (87%)                  | OGW81416 (78%)                                 |
| <i>hunH</i> | PF00361 (proton_antipo_M)                                                   | C341             | RXG63130 | HAJ31998 (94%)                                | TFB08693 (91%)                                    | OFW53492 (88%)                     | WP_090599466 (88%)                  | OIP66896 (89%)                   | N/A                               | N/A                             | OGW81417 (77%)                                 |
| <i>hunI</i> | PF13244 (DUF4040)                                                           | C1989            | RXG66691 | HAJ31999 (92%)                                | TFB08694 (95%)                                    | OFW53491 (89%)                     | WP_090599464 (89%)                  | OIP66895 (80%)                   | KPK39517 (83%)                    | OGW74728 (81%)                  | OGW81418 (72%)                                 |
| <i>hunJ</i> | PF04039 (MnhB)                                                              | C1989            | RXG66692 | HAJ32000 (97%)                                | TFB08695 (94%)                                    | OFW53490 (95%)                     | WP_090599461 (85%)                  | OIP66894 (88%)                   | KPK40785 (85%)                    | OGW74729 (84%)                  | OGW81419 (80%)                                 |
| <i>hunK</i> | PF00420 (Oxidored_q2)                                                       | C1989            | RXG66693 | HAJ32001 (96%)                                | TFB08696 (96%)                                    | OFW53489 (91%)                     | WP_090599460 (90%)                  | OIP66893 (90%)                   | KPK40786 (80%)                    | N/A                             | OGW81420 (76%)                                 |
| <i>hunL</i> | PF00361 (proton_antipo_M), PF00662 (proton_antipo_N)                        | C1989            | RXG66694 | HAJ32002 (96%)                                | TFB08697 (94%)                                    | OFW53498 (87%)                     | WP_090599470 (82%)                  | OIP66892 (86%)                   | N/A                               | OGW74730 (76%)                  | OGW81421 (74%)                                 |
| <i>hunM</i> | PF01899 (MNHE)                                                              | C1989            | RXG66695 | HAJ32003 (95%)                                | TFB08698 (98%)                                    | OFW53488 (87%)                     | WP_090599458 (86%)                  | OIP66891 (86%)                   | KPK40787 (73%)                    | OGW74758 (73%)                  | OGW81422 (65%)                                 |
| <i>hunN</i> | PF04066 (MrpF_PhaF)                                                         | C1989            | RXG66696 | HAJ32004 (96%)                                | TFB08699 (97%)                                    | N/A                                | WP_090599455 (95%)                  | OIP66905 (91%)                   | KPK40788 (85%)                    | OGW74759 (85%)                  | OGW81430 (70%)                                 |
| <i>hunO</i> | PF03334 (PhaG_MnhF_YufB)                                                    | C5669            | RXG63005 | HAJ32005 (91%)                                | TFB08700 (94%)                                    | OFW53487 (91%)                     | WP_090599453 (88%)                  | OIP66890 (91%)                   | KPK40789 (77%)                    | OGW74731 (74%)                  | OGW81423 (70%)                                 |
| <i>hunP</i> | PF12838 (Fer4_7)                                                            | C5669            | RXG63006 | HAJ32006 (89%)                                | TFB08701 (95%)                                    | N/A                                | WP_090599451 (91%)                  | OIP66889 (88%)                   | KPK40790 (81%)                    | OGW74732 (76%)                  | OGW81424 (75%)                                 |

32 **Table S6. Genes encoded on contigs containing the HTH-XRE transcriptional regulator/antitoxin AtiR in E10H5-B2 *Atribacteria* genomic**  
 33 **bin, as shown in Figure 5, and percent identity to homologous genes in other (meta)genomes (excluding Hydrate Ridge hits). Bolded genes**  
 34 **were expressed in the metaproteome. \*truncated protein; \*\*contain conserved arginine residue for carboxylate transport.**  
 35

| Annotation                            | Gene                                      | Contig                                                                | Gene                                      | Top hit (% identity)                                           | Top <i>Atribacteria</i> hit in environmental genome or top hit in non-Hydrate Ridge genome          |                                                                                                                                                                                                 |                                                                                                              |
|---------------------------------------|-------------------------------------------|-----------------------------------------------------------------------|-------------------------------------------|----------------------------------------------------------------|-----------------------------------------------------------------------------------------------------|-------------------------------------------------------------------------------------------------------------------------------------------------------------------------------------------------|--------------------------------------------------------------------------------------------------------------|
| HTH-XRE regulator                     | <i>atiR</i>                               | E10H5_C107                                                            | RXG62479                                  | HDK27529 (69%)                                                 | <i>Atribacteria</i> HyVt-22                                                                         |                                                                                                                                                                                                 |                                                                                                              |
|                                       |                                           | E10H5_C473                                                            | RXG64192                                  | HDK27529 (66%)                                                 | <i>Atribacteria</i> HyVt-22                                                                         |                                                                                                                                                                                                 |                                                                                                              |
|                                       |                                           | E10H5_C194                                                            | RXG65323                                  | HDK27529 (64%)                                                 | <i>Atribacteria</i> HyVt-22                                                                         |                                                                                                                                                                                                 |                                                                                                              |
|                                       |                                           | E10H5_C1742                                                           | RXG64293                                  | HDK27529 (72%)                                                 | <i>Atribacteria</i> HyVt-22                                                                         |                                                                                                                                                                                                 |                                                                                                              |
|                                       |                                           | E10H5_C95                                                             | RXG62928*                                 | HDK27529 (65%)                                                 | <i>Atribacteria</i> HyVt-22                                                                         |                                                                                                                                                                                                 |                                                                                                              |
|                                       |                                           | E10H5_C238                                                            | RXG62729                                  | HDK27529 (65%)                                                 | <i>Atribacteria</i> HyVt-22                                                                         |                                                                                                                                                                                                 |                                                                                                              |
|                                       |                                           | E10H5_C2                                                              | RXG66887                                  | HDK27529 (63%)                                                 | <i>Atribacteria</i> HyVt-22                                                                         |                                                                                                                                                                                                 |                                                                                                              |
|                                       |                                           | E10H5_C2                                                              | RXG66902                                  | HDK27529 (65%)                                                 | <i>Atribacteria</i> HyVt-22                                                                         |                                                                                                                                                                                                 |                                                                                                              |
|                                       |                                           | E10H5_C486                                                            | RXG66788                                  | HDK27529 (59%)                                                 | <i>Atribacteria</i> HyVt-22                                                                         |                                                                                                                                                                                                 |                                                                                                              |
|                                       |                                           | E10H5_C687                                                            | RXG66393                                  | HDK27529 (73%)                                                 | <i>Atribacteria</i> HyVt-22                                                                         |                                                                                                                                                                                                 |                                                                                                              |
|                                       |                                           | E10H5_C103                                                            | RXG62795                                  | HDK27529 (66%)                                                 | <i>Atribacteria</i> HyVt-22                                                                         |                                                                                                                                                                                                 |                                                                                                              |
|                                       |                                           | E10H5_C85                                                             | RXG66363                                  | HDK27529 (64%)                                                 | <i>Atribacteria</i> HyVt-22                                                                         |                                                                                                                                                                                                 |                                                                                                              |
|                                       |                                           | E10H5_C4712                                                           | RXG63519                                  | HDK27529 (67%)                                                 | <i>Atribacteria</i> HyVt-22                                                                         |                                                                                                                                                                                                 |                                                                                                              |
|                                       |                                           | E10H5_C1316                                                           | RXG65641                                  | HDK27529 (72%)                                                 | <i>Atribacteria</i> HyVt-22                                                                         |                                                                                                                                                                                                 |                                                                                                              |
|                                       |                                           | E10H5_C5280                                                           | RXG63000                                  | HDK27529 (78%)                                                 | <i>Atribacteria</i> HyVt-22                                                                         |                                                                                                                                                                                                 |                                                                                                              |
| E10H5_C2922                           | RXG65842                                  | HDK27529 (74%)                                                        | <i>Atribacteria</i> HyVt-22               |                                                                |                                                                                                     |                                                                                                                                                                                                 |                                                                                                              |
| Tripartite tricarboxylate transporter | <i>tctC</i><br><i>tctB</i><br><i>tctA</i> | E10H5_C95                                                             | RXG62929<br>RXG62930<br>RXG62931          | WP_066240574 (53%)<br>WP_118245178 (35%)<br>WP_093692001 (54%) | <i>Anaerospromusa subterranea</i><br><i>Clostridium</i> AM58-1XD<br><i>Sporolituus thermophilus</i> |                                                                                                                                                                                                 |                                                                                                              |
|                                       |                                           | <i>tctC</i><br><i>tctB</i><br><i>tctA</i><br><i>sat</i><br><i>hyp</i> | E10H5_C107                                | RXG62483<br>RXG62484<br>RXG62485<br>RXG62486<br>RXG62487       | MBN2395378 (71%)<br>MBN2395379 (53%)<br>MBN2395380 (68%)<br>MBN2395381 (68%)<br>MBN2395382 (61%)    | <i>Atribacteria</i> Zod_Metabat.864<br><i>Atribacteria</i> Zod_Metabat.864<br><i>Atribacteria</i> Zod_Metabat.864<br><i>Atribacteria</i> Zod_Metabat.864<br><i>Atribacteria</i> Zod_Metabat.864 |                                                                                                              |
|                                       | C4-dicarboxylate transporter              |                                                                       | <i>dctP</i><br><i>dctQ</i><br><i>dctM</i> | E10H5_C95                                                      | RXG62935**<br><b>RXG62936</b><br>RXG62937                                                           | PKL21426 (55%)<br><b>AEG13811 (34%)</b><br>PKL21182 (57%)                                                                                                                                       | <i>Spirochaetae</i> HGW-1<br><b><i>Desulfofundulus kuznetsovii</i> DSM 6115</b><br><i>Spirochaetae</i> HGW-4 |
|                                       |                                           |                                                                       |                                           | <i>dctP</i><br><i>dctQ</i><br><i>dctM</i>                      | E10H5_C238                                                                                          | RXG62728<br>RXG62727<br>RXG62726                                                                                                                                                                | HBV57297 (84%)<br>HBV57298 (74%)<br>HBV57299 (80%)                                                           |
|                                       |                                           |                                                                       | <i>dctP</i><br><i>dctQ</i><br><i>dctM</i> |                                                                | E10H5_C486                                                                                          | RXG66786**<br>RXG66785<br>RXG66784                                                                                                                                                              | HDK26676 (86%)<br>HDK26675 (69%)<br>HDK26674 (82%)                                                           |
|                                       |                                           | <i>dctP</i><br><i>dctQ</i><br><i>dctM</i>                             |                                           | E10H5_C664                                                     | RXG63168<br>RXG63170<br>RXG63171                                                                    | HAI33545 (72%)<br>HAI33544 (73%)<br>HAI33543 (84%)                                                                                                                                              | <i>Atribacteria</i> UBA7920<br><i>Atribacteria</i> UBA7920<br><i>Atribacteria</i> UBA7920                    |
| Glycerol-3-phosphate transporter      | <i>ugpB</i><br><i>ugpA</i><br><i>ugpE</i> | E10H5_C85                                                             | RXG66368<br>RXG66369<br>RXG66370          | KPJ85459 (68%)<br>KPJ85458 (67%)<br>KPJ85457 (71%)             | <i>Spirochaetes</i> DG_61<br><i>Spirochaetes</i> DG_61<br><i>Spirochaetes</i> DG_61                 |                                                                                                                                                                                                 |                                                                                                              |
|                                       |                                           | <i>ugpB</i>                                                           | E10H5_C103                                | RXG62790                                                       | WP_068137292 (47%)                                                                                  | <i>Limnochorda pilosa</i>                                                                                                                                                                       |                                                                                                              |

|                                        |                                                                         |                                                          |                                                          |                                                                                        |                                                                                                                                                                     |
|----------------------------------------|-------------------------------------------------------------------------|----------------------------------------------------------|----------------------------------------------------------|----------------------------------------------------------------------------------------|---------------------------------------------------------------------------------------------------------------------------------------------------------------------|
|                                        | <i>ugdA</i><br><i>ugdE</i>                                              |                                                          | RXG62789<br>RXG62788                                     | WP_082726097 (46%)<br>WP_068137283 (46%)                                               | <i>Limnochorda pilosa</i><br><i>Limnochorda pilosa</i>                                                                                                              |
| Branched chain amino acid transporters | <i>livH</i><br><i>livM</i><br><i>livG</i><br><i>livF</i><br><i>livK</i> | E10H5_C2                                                 | RXG66901<br>RXG66900<br>RXG66899<br>RXG66898<br>RXG66897 | PKP61938 (90%)<br>PKP61939 (85%)<br>PKP61948 (85%)<br>PKP61940 (80%)<br>PKP61941 (89%) | <i>Atribacteria</i> HGW-1<br><i>Atribacteria</i> HGW-1<br><i>Atribacteria</i> HGW-1<br><i>Atribacteria</i> HGW-1<br><i>Atribacteria</i> HGW-1                       |
|                                        | <i>livH</i><br><i>livM</i><br><i>livG</i><br><i>livF</i>                | E10H5_C238                                               | RXG62732<br>RXG62736<br>RXG62731<br>RXG62730             | RLE68614 (60%)<br>RLE68615 (55%)<br>RLE68616 (57%)<br>RLE68617 (56%)                   | <i>Thermoprotei</i> archaeon<br><i>Thermoprotei</i> archaeon<br><i>Thermoprotei</i> archaeon<br><i>Thermoprotei</i> archaeon                                        |
|                                        | <i>livK</i><br><i>livH</i><br><i>livM</i><br><i>livG</i><br><i>livF</i> | E10H5_C687                                               | RXG66394<br>RXG66395<br>RXG66396<br>RXG66397<br>RXG66398 | OQY40502 (43%)<br>OQY40503 (41%)<br>OQY40504 (42%)<br>OGP70799 (50%)<br>OQY40505 (55%) | <i>Atribacteria</i> 4572_76<br><i>Atribacteria</i> 4572_76<br><i>Atribacteria</i> 4572_76<br><i>Deltaproteobacteria</i> RBG_16_50_11<br><i>Atribacteria</i> 4572_76 |
|                                        | <b><i>livH</i></b><br><i>livM</i>                                       | <b>E10H5_C8009</b>                                       | <b>30420</b><br>30421                                    | <b>OQY40503 (95%)</b><br>OQY40504 (93%)                                                | <b><i>Atribacteria</i> 4572_76</b><br><i>Atribacteria</i> 4572_76                                                                                                   |
|                                        | Purine transporter                                                      | <b><i>bmpA</i></b>                                       | <b>E10H5_C473</b>                                        | <b>RXG64193</b><br>RXG64197<br>RXG64194<br>RXG64195                                    | <b>PKP58720 (94%)</b><br>PKP60518 (88%)<br>PKP60517 (94%)<br>PKP60516 (96%)                                                                                         |
| M20 (zinc peptidase, amidohydrolase)   |                                                                         | <b>E10H5_C194</b>                                        | RXG65322<br>RXG65321<br>RXG65329                         | WP_034420537 (72%)<br>WP_034420536 (73%)<br>WP_034420535 (75%)                         | <i>Clostridiales</i> DRI-13<br><i>Clostridiales</i> DRI-13<br><i>Clostridiales</i> DRI-13                                                                           |
| Sulfur-related (and neighboring)       | <i>sat</i>                                                              | E10H5_C107                                               | RXG62486<br>RXG62487                                     | HDK26586 (85%)<br>HDK26585 (67%)                                                       | <i>Atribacteria</i> HyVt-22<br><i>Atribacteria</i> HyVt-22                                                                                                          |
| Other genes                            | <i>gabT</i><br>C69<br>RTX<br>RTX/Ig                                     | E10H5_C4712<br>E10H5_C2795<br>E10H5_C1316<br>E10H5_C2922 | RXG63518<br>RXG64595<br>RXG65639<br>RXG65844             | PKP55816 (87%)<br>WP_093794159 (43%)<br>OGD35967 (42%)<br>OGD35967 (43%)               | <i>Atribacteria</i> HGW-1<br><i>Sporomusa acidovorans</i><br><i>Atribacteria</i> RBG_16_35_8<br><i>Atribacteria</i> RBG_16_35_8                                     |



37  
38

**Table S7. Putative toxin-antitoxin systems in *Atribacteria* E10H5-B2, and percent identity to homologous genes in other genomes.**

| Annotation | Gene      | Contig      | Gene     | Top hit (% identity) | Top hit                                           |    |
|------------|-----------|-------------|----------|----------------------|---------------------------------------------------|----|
| Antitoxin  | MazE-like | E10H5_C26   | RXG62841 | PIU28774 (82%)       | <i>Actinobacteria</i> CG08_land_8_20_14_0_20_35_9 | 39 |
| Toxin      | MazF-like |             | RXG62840 | PIU28775 (88%)       | <i>Actinobacteria</i> CG08_land_8_20_14_0_20_35_9 | 40 |
| Antitoxin  | NikR-like | E10H5_C33   | RXG63986 | PIU25819 (95%)       | <i>Atribacteria</i> CG08_land_8_20_14_0_20_33_29  | 41 |
| Toxin      | MazF-like |             | RXG63985 | PIU25820 (83%)       | <i>Atribacteria</i> CG08_land_8_20_14_0_20_33_29  | 42 |
| Antitoxin  | MazE-like | E10H5_C68   | RXG64905 | PKP54844 (89%)       | <i>Atribacteria</i> HGW-1                         | 44 |
| Toxin      | MazF-like |             | RXG64906 | PKP54843 (84%)       | <i>Atribacteria</i> HGW-1                         | 45 |
| Antitoxin  | VapC-like | E10H5_C81   | RXG64104 | PKP54729 (90%)       | <i>Atribacteria</i> HGW-1                         | 46 |
| Toxin      | MazE-like |             | RXG64105 | PKP54728 (81%)       | <i>Atribacteria</i> HGW-1                         | 47 |
| Antitoxin  | MazE-like | E10H5_C81   | RXG64330 | PIY33044 (92%)       | <i>Atribacteria</i> CG_4_10_14_3_um_filter_34_134 | 48 |
| Toxin      | MazF-like |             | RXG64331 | PIY33045 (92%)       | <i>Atribacteria</i> CG_4_10_14_3_um_filter_34_134 | 49 |
| Antitoxin  | MazE-like | E10H5_C184  | RXG64099 | OQY39409 (97%)       | <i>Atribacteria</i> 4572_76                       | 50 |
| Toxin      | MazF-like |             | RXG64098 | OQY39408 (98%)       | <i>Atribacteria</i> 4572_76                       | 51 |
| Antitoxin  | MazE-like | E10H5_C1146 | RXG64860 | WP_090599534 (91%)   | <i>Atribacteria</i> JGI 0000014-F07               | 52 |
| Toxin      | MazF-like |             | RXG64859 | WP_090599536 (89%)   | <i>Atribacteria</i> JGI 0000014-F07               | 53 |
| Antitoxin  | MazE-like | E10H5_C1351 | RXG65145 | PKP54770 (94%)       | <i>Atribacteria</i> HGW-1                         | 54 |
| Toxin      | MazF-like |             | RXG65146 | PKP54769 (89%)       | <i>Atribacteria</i> HGW-1                         | 55 |
| Antitoxin  | MazE-like | E10H5_C5010 | RXG67035 | WP_078128337 (59%)   | <i>Leptospira alexanderi</i>                      |    |
| Toxin      | MazF-like |             | RXG67036 | WP_010577027 (74%)   | <i>Leptospira alexanderi</i>                      |    |

56 **Table S8. Glycosyltransferase contigs in E10-H5-B2 *Atribacteria* genomic bin, and percent identity to homologous genes in other genomes.**

| Annotation                                                | Contig        | Gene        | Top hit (% identity) | Top hit                                           |
|-----------------------------------------------------------|---------------|-------------|----------------------|---------------------------------------------------|
| Glycosyltransferase 2                                     | E10H5_C38     | N/A         | OFW63513 (72%)       | <i>Actinobacteria</i> RBG_19FT_COMBO_36_27        |
| Glycosyltransferase 1                                     |               | RXG64781    | OFW63514 (72%)       | <i>Actinobacteria</i> RBG_19FT_COMBO_36_27        |
| Glycosyltransferase 2                                     |               | RXG64782    | OGD31966 (66%)       | <i>Atribacteria</i> RBG_16_35_8                   |
| Glycosyltransferase 2                                     |               | RXG64783    | WP_104083790 (34%)   | <i>Cryobacterium</i> Y11                          |
| Glycosyltransferase 2                                     |               | RXG64791    | GBC98638 (43%)       | Bacterium HR17                                    |
| NAD-dependent epimerase/dehydratase                       |               | RXG64792    | OFW55242 (82%)       | <i>Actinobacteria</i> RBG_13_35_12                |
| NDP-sugar synthase                                        |               | RXG64793    | OFW55241 (82%)       | <i>Actinobacteria</i> RBG_13_35_12                |
| GDP-mannose 4,6-dehydratase                               |               | RXG64794    | OFW55240 (88%)       | <i>Actinobacteria</i> RBG_13_35_12                |
| Glycosyltransferase 1                                     | E10H5_C81     | RXG64335    | WP_093394743 (45%)   | <i>Thermodesulforhabdus norvegica</i>             |
| Glycosyltransferase 1                                     |               | RXG64336    | WP_093394743 (53%)   | <i>Thermodesulforhabdus norvegica</i>             |
| Glycosyltransferase 1                                     |               | RXG64337    | OGI06781 (40%)       | <i>Melainabacteria</i> RIFCSPLOWO2_12_FULL_35_11  |
| Glycosyltransferase 1                                     |               | RXG64338    | SPE32180 (46%)       | <i>Solibacteres</i> SbA2                          |
| O-antigen ligase                                          |               | RXG64339    | OGD19921 (30%)       | <i>Aminicenantes</i> RBG_13_64_14                 |
| Glycosyltransferase 1                                     |               | RXG64340    | OGD19922 (55%)       | <i>Aminicenantes</i> RBG_13_64_14                 |
| Polysaccharide (de)acetylase                              | E10H5_C230    | RXG63410    | WP_019599125 (28%)   | <i>Rhodonellum</i> spp.                           |
| Exopolysaccharide polyprenyl glycosylphosphotransferase   |               | RXG63411    | PKP61696 (88%)       | <i>Atribacteria</i> HGW-1                         |
| Sugar epimerase                                           |               | RXG63412    | PKP61697 (77%)       | <i>Atribacteria</i> HGW-1                         |
| Glycosyltransferase 1 (Cap1E-like)                        |               | RXG63413    | WP_071120025 (57%)   | <i>Romboutsia timonensis</i>                      |
| UDP-N-acetylglucosamine 4-epimerase                       |               | RXG63414    | WP_036938033 (71%)   | <i>Pseudobacteroides celluloso</i> lvens          |
| Vi polysaccharide biosynthesis protein                    |               | RXG63415    | WP_071120026 (68%)   | <i>Romboutsia timonensis</i>                      |
| Phospholipid carrier-dependent glycosyltransferase        |               | RXG63416    | WP_036935155 (48%)   | <i>Pseudobacteroides celluloso</i> lvens          |
| Glycosyltransferase                                       |               | RXG63417    | PJE73714 (51%)       | Terrybacteria CG10_big_fil_rev_8_21_14_0_10_41_10 |
| Phospholipid carrier-dependent glycosyltransferase        |               | RXG63418    | WP_036935155 (43%)   | <i>Pseudobacteroides celluloso</i> lvens          |
| Glycosyltransferase 1                                     |               | E10H5_C3323 | RXG63206             | PKP61698 (81%)                                    |
| GDP-fucose synthetase                                     | RXG63207      |             | PKP61699 (85%)       | <i>Atribacteria</i> HGW-1                         |
| GDP-mannose 4,6-dehydratase                               | (2,613-2,990) |             | PKP61700 (82%)       | <i>Atribacteria</i> HGW-1                         |
| UDP-glucose 6-dehydrogenase (Ugd)                         | E10H5_C266    | RXG63573    | PKP61722 (77%)       | <i>Atribacteria</i> HGW-1                         |
| NAD-dependent epimerase/dehydratase                       |               | RXG63566    | PKP59007 (93%)       | <i>Atribacteria</i> HGW-1                         |
| Aminotransferase                                          |               | RXG63567    | PKP59008 (93%)       | <i>Atribacteria</i> HGW-1                         |
| Formyltransferase (non-ribosomal peptide synthetase-like) |               | RXG63568    | PKP59009 (90%)       | <i>Atribacteria</i> HGW-1                         |
| Acetyltransferase                                         |               | RXG63569    | PKP59010 (87%)       | <i>Atribacteria</i> HGW-1                         |
| Deacetylase                                               |               | RXG63570    | RME50047 (61%)       | <i>Deltaproteobacteria</i> bacterium              |
| 7-keto-8-aminopelargonate synthetase                      | E10H5_C306    | RXG65589    | OGD15025 (91%)       | <i>Atribacteria</i> RBG_19FT_COMBO_35_14          |
| UDP-glucose 4-epimerase                                   |               | RXG65590    | OGD15024 (84%)       | <i>Atribacteria</i> RBG_19FT_COMBO_35_14          |
| UDP-glucose 4-epimerase                                   | E10H5_C441    | RXG65590    | OGD15024 (87%)       | <i>Atribacteria</i> RBG_19FT_COMBO_35_14          |
| Radical SAM P-methyltransferase                           | E10H5_C558    | RXG63508    | OGD16377 (81%)       | <i>Atribacteria</i> RBG_19FT_COMBO_35_14          |
| Glycosyltransferase 1                                     | E10H5_C1163   | RXG62499    | WP_090599978 (92%)   | <i>Atribacteria</i> JGI_0000014-F07               |
| Glycosyltransferase 1 (Cap1E-like)                        | E10H5_C3994   | RXG63236    | WP_071605078 (53%)   | <i>Anaeroarcus burkinensis</i>                    |
| Exopolysaccharide polyprenyl glycosylphosphotransferase   |               | RXG63237    | PKP62045 (76%)       | <i>Atribacteria</i> HGW-1                         |
| Acetyltransferase                                         |               | RXG63239    | PKP62044 (84%)       | <i>Atribacteria</i> HGW-1                         |
| Polysaccharide biosynthesis protein                       |               | RXG63238    | PKP62043 (87%)       | <i>Atribacteria</i> HGW-1                         |

|                                                                                  |             |                      |                                  |                                                                                          |
|----------------------------------------------------------------------------------|-------------|----------------------|----------------------------------|------------------------------------------------------------------------------------------|
| Glycosyltransferase 4<br>Cyclic nucleotide-binding domain-<br>containing protein | E10H5_C4124 | RXG64087<br>RXG64088 | PKP55791 (95%)<br>PKP55792 (93%) | <i>Atribacteria</i> HGW-1<br><i>Atribacteria</i> HGW-1                                   |
| NAD-dependent epimerase/dehydratase<br>Glycosyltransferase 4                     | E10H5_C4631 | RXG66927<br>RXG66928 | PKP58948 (97%)<br>PKP58071 (83%) | <i>Atribacteria</i> HGW-1<br><i>Atribacteria</i> HGW-1                                   |
| Bacillithiol biosynthesis deacetylase<br>Glycosyltransferase 2                   | E10H5_C4676 | RXG65226<br>RXG65225 | OGD13744 (93%)<br>OGW00676 (55%) | <i>Atribacteria</i> RBG_19FT_COMBO_35_14<br><i>Nitrospinae</i> RIFCSPLOWO2_01_FULL_39_10 |

57  
58

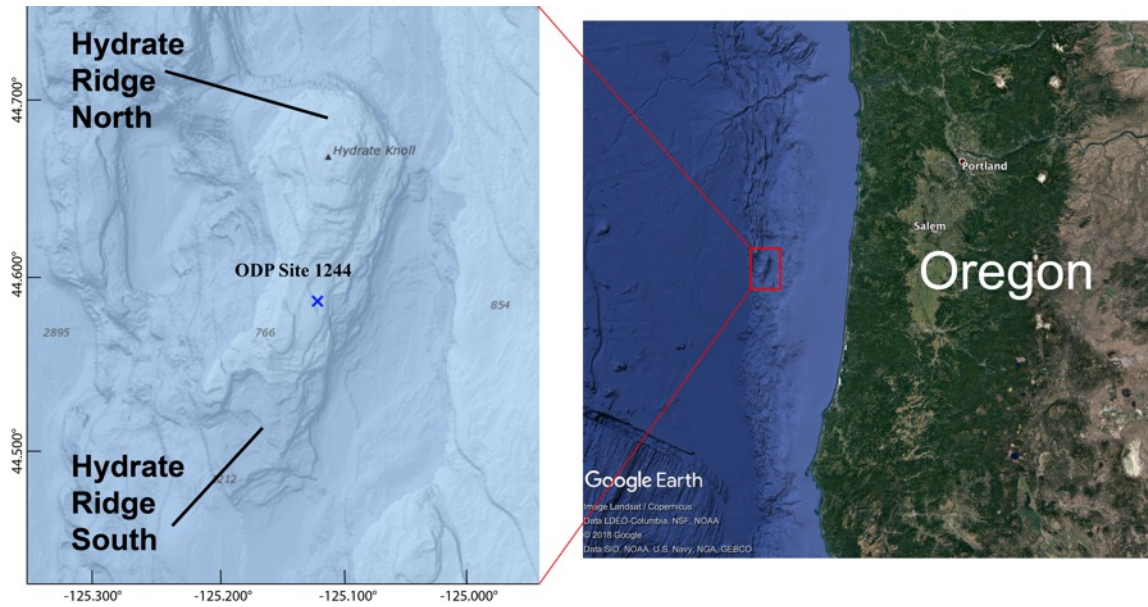

59

60 **Figure S1.** Map of Site ODP 1244 ( $44^{\circ}35.1784'N$ ;  $125^{\circ}7.1902'W$ ) on Hydrate Ridge, drilled on IODP Leg 204. The site is located 80 km west of  
 61 Oregon, in the accretionary complex of the Cascadia subduction zone, on the eastern flank of Hydrate Ridge, ~3 km northeast of the southern summit.

62

63

64

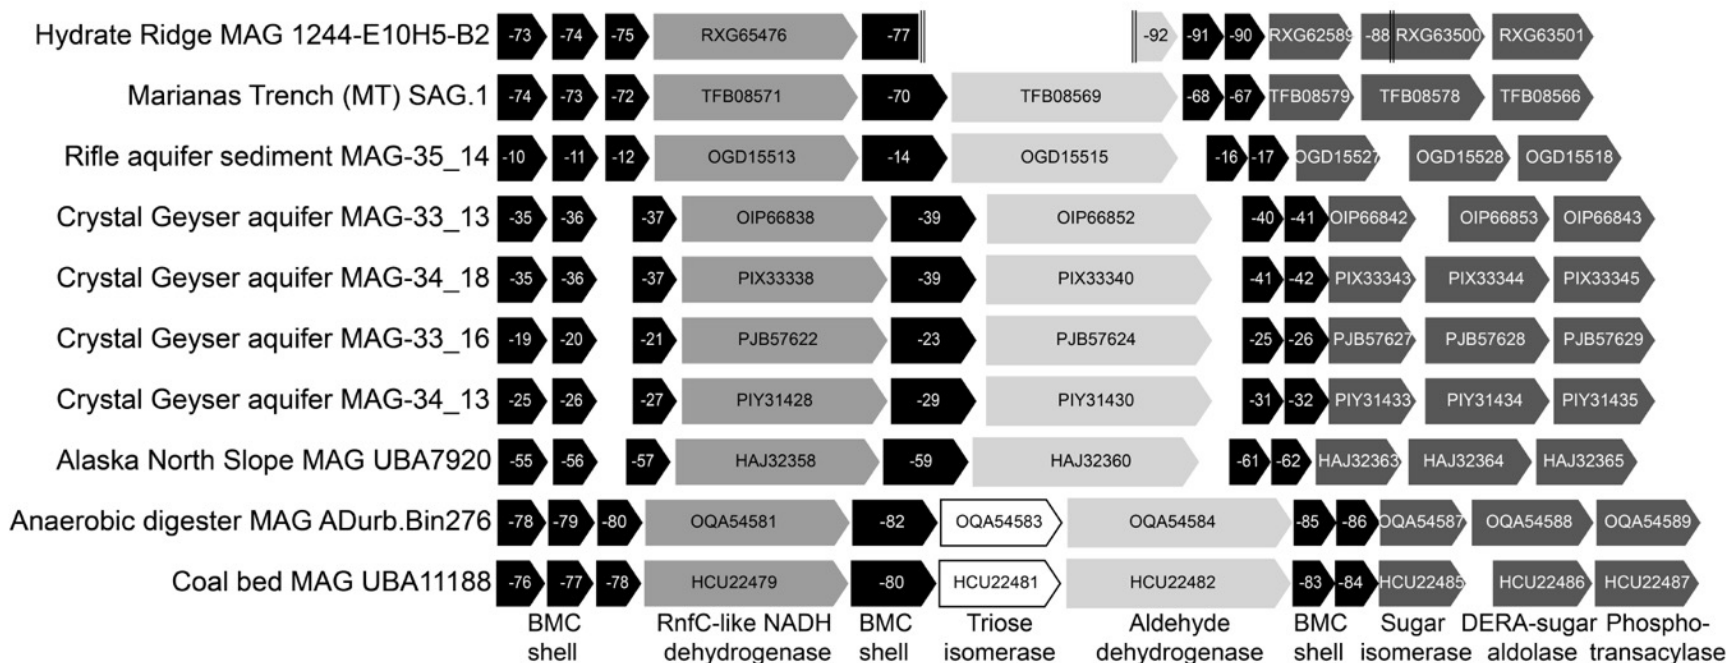

65  
66

67 **Figure S2.** Bacterial microcompartment (BMC) gene loci from *Atribacteria* (JS-1) MAGs and SAGs in UniProt. Each gene is labeled with its NCBI  
68 accession. Short genes are labeled with the last two digits of the NCBI accession (see neighboring genes for remainder of accession). The BMC loci  
69 from Hydrate Ridge MAG 1244-E10H5-B2 is distributed over three short contigs with some genes truncated (indicated by double vertical lines).
